1 Antigenic variation by switching inter-chromosomal interactions  
2 with an RNA splicing locus in trypanosomes

3 **Authors:** Joana Faria<sup>1¶</sup>, Vanessa Luzak<sup>2,3¶</sup>, Laura S.M. Müller<sup>2,3¶</sup>, Benedikt G. Brink<sup>2,3</sup>,  
4 Sebastian Hutchinson<sup>1†</sup>, Lucy Glover<sup>1#</sup>, David Horn<sup>1\*</sup>, T. Nicolai Siegel<sup>2,3\*</sup>

6 **Affiliations:**

7 <sup>1</sup>The Wellcome Trust Centre for Anti-Infectives Research, School of Life Sciences,  
8 University of Dundee, Dow Street, Dundee DD1 5EH, UK.

9 <sup>2</sup>Department of Veterinary Sciences, Experimental Parasitology, Ludwig-Maximilians-  
10 Universität München, Lena-Christ-Str. 48, 82152 Planegg-Martinsried, Germany

11 <sup>3</sup>Biomedical Center Munich, Department of Physiological Chemistry, Ludwig-Maximilians-  
12 Universität München, Großhaderner Str. 9, 82152 Planegg-Martinsried, Germany

13 <sup>†</sup>Current address: Trypanosome Cell Biology Unit, INSERM U1201, Department of Parasites  
14 and Insect Vectors, Institut Pasteur, 25-28 Rue du Docteur Roux 75015, Paris, France.

15 <sup>#</sup>Current address: Trypanosome Molecular Biology, Department of Parasites and Insect  
16 Vectors, Institut Pasteur, 25-28 Rue du Docteur Roux 75015, Paris, France.

17  
18 ¶ These authors contributed equally

19 \* Correspondence: NS, [n.siegel@lmu.de](mailto:n.siegel@lmu.de); DH, [d.horn@dundee.ac.uk](mailto:d.horn@dundee.ac.uk)

20  
21 **Keywords:** 3D genome architecture; RNA maturation; antigenic variation; monoallelic;  
22 *Trypanosoma brucei*.

23

24 **Abstract**

25 Highly selective gene expression is a key requirement for antigenic variation in several  
26 pathogens, allowing evasion of host immune responses and maintenance of persistent  
27 infections. African trypanosomes, parasites that cause lethal diseases in humans and  
28 livestock, employ an antigenic variation mechanism that involves monogenic antigen  
29 expression from a pool of >2500 antigen coding genes. In other eukaryotes, the expression of  
30 individual genes can be enhanced by mechanisms involving the juxtaposition of otherwise  
31 distal chromosomal loci in the three-dimensional nuclear space. However, trypanosomes lack  
32 classical enhancer sequences or regulated transcription initiation and the monogenic  
33 expression mechanism has remained enigmatic. Here, we show that the single expressed  
34 antigen coding gene displays a specific inter-chromosomal interaction with a major mRNA  
35 splicing locus. Chromosome conformation capture (Hi-C), revealed a dynamic reconfiguration  
36 of this inter-chromosomal interaction upon activation of another antigen. Super-resolution  
37 microscopy showed the interaction to be heritable and splicing dependent. We find that the  
38 two genomic loci are connected by the antigen exclusion complex, whereby VEX1 associated  
39 with the splicing locus and VEX2 with the antigen coding locus. Following VEX2 depletion,  
40 loss of monogenic antigen expression was accompanied by increased interactions between  
41 previously silent antigen genes and the splicing locus. Our results reveal a novel mechanism  
42 to ensure monogenic expression, requiring the spatial integration of antigen transcription and  
43 mRNA splicing in a dedicated compartment. These findings suggest a new means of post-  
44 transcriptional gene regulation.

45

46 **Main Text:**

47 Monogenic expression, the expression of a single gene from a large gene family, is  
48 essential for several important biological processes. One of the most striking examples of such  
49 regulation is the expression of a single odorant receptor from more than 1400 genes in  
50 mammalian olfactory sensory neurons <sup>1</sup>. Likewise, monogenic expression is a key feature of  
51 antigenic variation, an immune evasion strategy used by pathogens such as *Plasmodium*  
52 *falciparum* or *Trypanosoma brucei*. Antigenic variation refers to the capacity of an infecting  
53 organism to systematically alter the identity of proteins displayed to the host immune system  
54 <sup>2</sup>. How pathogens ensure the exclusive expression of only one antigen from a large pool of  
55 antigen coding genes remains one of the most intriguing questions in infection biology.

56 In *T. brucei*, a unicellular parasite responsible for lethal and debilitating diseases in  
57 humans and animals, 10 million copies of a single variant surface glycoprotein (VSG) isoform  
58 are exposed on the surface of the parasite. The exclusive expression of only one VSG gene  
59 per cell and the periodic switching of the expressed VSG gene allow the parasite to evade the  
60 host immune system and to maintain persistent infections <sup>3,4</sup>. While the *T. brucei* genome  
61 encodes for >2600 VSG isoforms, in the bloodstream of the mammalian host, a VSG gene  
62 can only be transcribed when located in one of ~15 VSG expression sites. Those bloodstream  
63 expression sites are polycistronic transcription units located adjacent to telomeres on different  
64 chromosomes. Each bloodstream expression site contains an RNA polymerase I (Pol I)  
65 promoter, followed by several expression site associated genes (ESAGs) and a single VSG  
66 gene <sup>5</sup>.

67 Notably, Pol I transcription initiates at all VSG expression site promoters, but  
68 transcription elongation and transcript processing are highly selective and limited to just one  
69 expression site at a time <sup>6,7</sup>. As a result, the single active VSG gene is expressed as the most  
70 abundant mRNA and protein in the cell; 5-10% of the total in each case. Why transcription is  
71 aborted at all but one expression site is not known, but it has been shown that only transcripts

72 from the actively transcribed expression site are processed into mature mRNA. In  
73 trypanosomes, mRNA maturation involves *trans*-splicing, a process that adds a common  
74 spliced leader sequence to each pre-mRNA and is coupled to polyadenylation <sup>8</sup>. In addition,  
75 the proximity of individual genes to nuclear condensates composed of splicing factors has  
76 recently been proposed to play a role in gene expression regulation in mammals <sup>9,10</sup>. Thus,  
77 regulated access to RNA maturation compartments may represent an evolutionary conserved  
78 strategy for gene expression control.

79         One mechanism to ensure monogenic expression is the juxtaposition of otherwise  
80 distal chromosomal loci in the three-dimensional nuclear space. In particular, specific  
81 interactions between promoter and enhancer sequence elements can ensure the selective  
82 regulation of individual genes. Although classic enhancer structures appear to be absent in  
83 many unicellular eukaryotes such as trypanosomes, several observations suggest that a  
84 specific genome organization is required for monogenic VSG expression. The single active  
85 VSG gene is transcribed in an extranucleolar Pol I compartment known as the expression site  
86 body <sup>11</sup>. In those very rare cases (<10<sup>-8</sup>) where two VSG genes are simultaneously active,  
87 both co-localize at the expression site body <sup>12,13</sup>. In addition, the transcribed chromosome core  
88 regions and the sub-telomeric regions coding for the large reservoir of silent VSG genes,  
89 appear to fold into structurally distinct compartments <sup>5</sup>, similar to active A and silent B  
90 compartments described in mammalian cells <sup>14</sup>. While the nature of the expression site body  
91 has remained enigmatic, a protein complex specifically associated with the active VSG gene  
92 was identified recently. VSG-exclusion 1 (VEX1) emerged from a genetic screen for allelic  
93 exclusion regulators <sup>15</sup> while VEX2 was affinity-purified in association with VEX1 <sup>16</sup>. The  
94 bipartite VEX protein complex maintains mutually exclusive VSG expression <sup>16</sup> but it remains  
95 unclear how these proteins exert their function. In this study we aimed to identify the  
96 mechanism that connects RNA maturation, genome architecture and the VEX complex to  
97 ensure monogenic antigen expression.

98           Given the well-characterized role of promoter-enhancer interactions in the selective  
99 regulation of genes, we set out to identify specific DNA-DNA interactions with a regulatory role  
100 in monogenic VSG expression. To this end we used a *T. brucei* culture homogenously  
101 expressing a single VSG gene for chromosome conformation capture (Hi-C) analysis. In  
102 addition, we employed the mHi-C analysis pipeline, which allowed us to retain many multi-  
103 mapping reads and greatly increased the read coverage across repetitive regions of the  
104 genome <sup>17</sup>.

105           In order to visualize specific interaction patterns of loci of interest (viewpoints) in the  
106 Hi-C dataset, we applied a virtual 4C analysis pipeline to extract genome-wide interaction  
107 profiles for chosen viewpoints. To identify VSG gene specific interaction patterns, we chose  
108 the active and several inactive VSG genes located in expression sites as viewpoints and  
109 plotted the extracted virtual 4C interaction data onto the genome. As expected, we observed  
110 a distance-dependent decay of intra-chromosomal interactions between each viewpoint and  
111 its upstream and downstream genomic region (**Fig. 1a and Extended Data Fig. 1a**).

112           Strikingly, we found the active *VSG-2* gene located on chr. 6 in expression site 1 to  
113 very frequently interact with a single, distinct locus on chr. 9 (**Fig. 1a-b**). Levels of interaction  
114 frequency were higher than intra-chromosomal interactions of *VSG-2* with its genomic location  
115 on chr. 6, pointing to a strong and stable inter-chromosomal interaction. The locus on chr. 9  
116 interacting with the active VSG gene is the SL-RNA array, a genomic locus essential for RNA  
117 maturation. This locus contains a cluster of ~150–200 tandemly repeated genes encoding the  
118 spliced leader RNA (SL-RNA). SL-RNA is an RNA Pol II-transcribed ncRNA that is *trans*-  
119 spliced to the 5'-end of all trypanosome mRNAs, conferring the 5'-cap structure required for  
120 RNA maturation, export and translation <sup>8</sup>. Conversely, VSG genes residing in inactive  
121 expression sites interacted less frequently or at background levels with the SL-RNA locus  
122 (**Fig. 1a-b and Extended Data Fig. 1a**). In agreement with these observations, when we  
123 chose the SL-RNA locus as viewpoint, we found it to interact more frequently with the active

124 VSG expression site than with any inactive VSG expression site (**Extended Data Fig. 1b**).  
125 Thus, the Hi-C analysis revealed a strong and selective interaction between the Pol I-  
126 transcribed active VSG gene and the Pol II-transcribed SL-RNA locus located on a different  
127 chromosome.

128 To visualize the spatial proximity between the active VSG gene and the SL-RNA locus  
129 at the level of individual cells and with an independent assay, we performed super-resolution  
130 immunofluorescence microscopy. The site of VSG transcription is characterized by an extra-  
131 nucleolar accumulation of RNA Pol I <sup>11</sup>. The site of Pol II-transcribed SL-RNA is marked by an  
132 accumulation of the small nuclear RNA-activating protein complex (tSNAPc), an RNA Pol II  
133 promoter-binding transcription factor <sup>18</sup>. Both the VSG transcription and the SL-RNA  
134 transcription compartments appear to have diameters of approx. 300 nm, within a *T. brucei*  
135 nucleus with a diameter of approx. 2  $\mu$ m. Super-resolution microscopy revealed one VSG  
136 transcription compartment, reflecting the hemizygous active sub-telomeric *VSG-2*, and two  
137 separate SL-RNA transcription compartments, reflecting the diploid SL-RNA arrays located in  
138 the core of chr. 9 (**Fig. 1c**). By scoring nuclei for overlapping, adjacent or separate VSG and  
139 SL-RNA transcription compartments, we found that one of the SL-RNA transcription  
140 compartments was adjacent to the VSG transcription compartment in the majority of cells (**Fig.**  
141 **1c**). However, during DNA replication in S phase, the VSG and SL-RNA transcription  
142 compartments were detected in separate locations in >50% of nuclei (**Fig. 1c and Extended**  
143 **Data Fig. 1c**). Therefore, throughout this study, immunofluorescence assays (IFAs) were  
144 subsequently performed in G1 cells, unless indicated otherwise. Taken together, IFAs  
145 supported the findings made by Hi-C, suggesting that the Pol I VSG transcription compartment  
146 interacts with one of the Pol II SL-RNA transcription compartments. Further, they suggest that  
147 the interaction between both compartments is resolved during S phase and successfully re-  
148 established after replication.

149

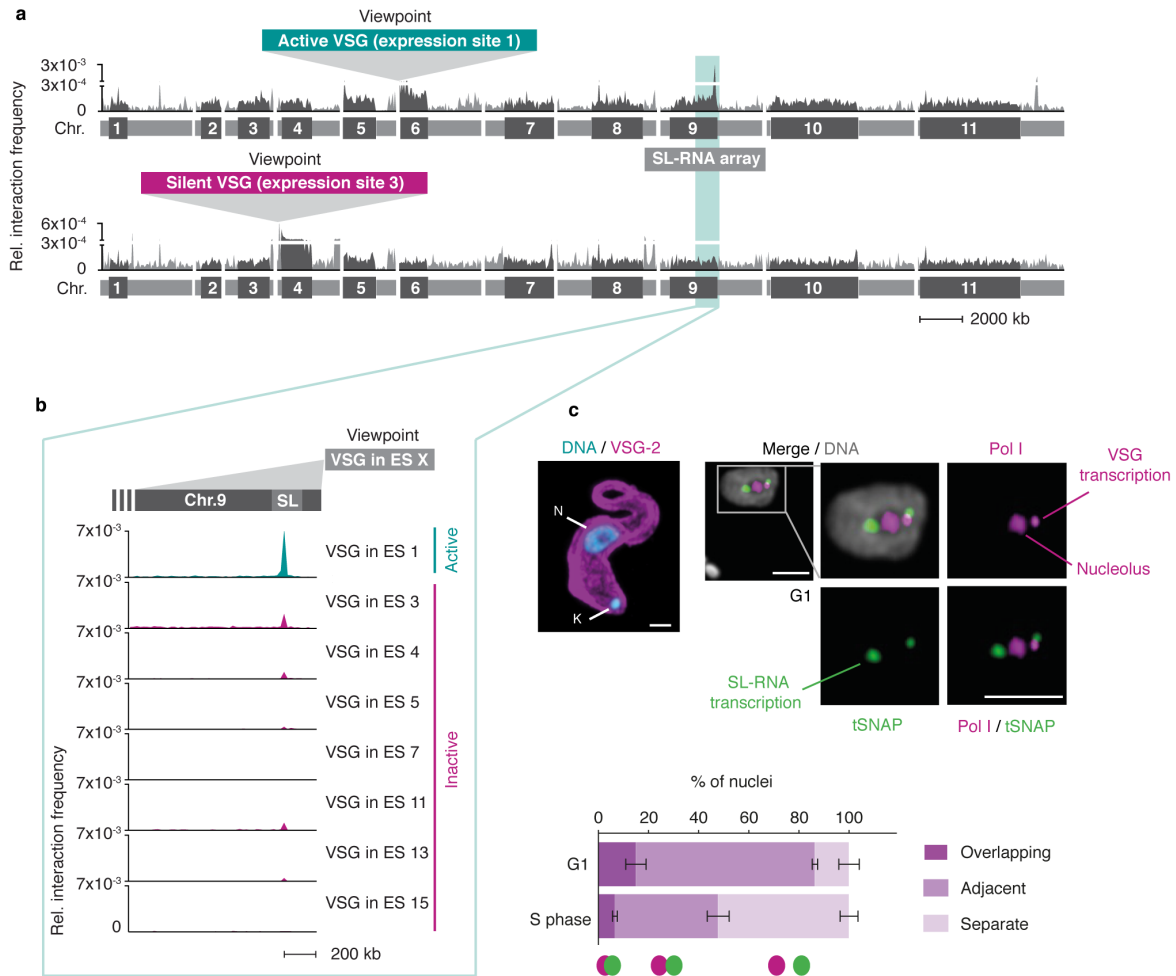

150  
151  
152  
153  
154  
155  
156  
157  
158  
159  
160  
161  
162  
163  
164  
165  
166  
167  
168

**Fig. 1: The active VSG expression site (ES) stably interacts with the spliced leader RNA (SL) array.** **a**, Hi-C (virtual 4C) analysis, viewpoints: active VSG gene in ES1 (*VSG-2*, top panel) and silent VSG gene in ES 3 (*VSG-6*, bottom panel). Relative interaction frequencies between the viewpoint and the 11 megabase chromosomes are shown. Chromosome cores, dark grey; sub-telomeric regions, light grey. The hemizygous sub-telomeric regions are displayed in the following order: 5' (haplotype A)–5' (haplotype B)–diploid chromosome core–3' (haplotype A)–3' (haplotype B). Bin size 50 kb. **b**, Virtual 4C analysis, viewpoints: active VSG gene in ES 1 and inactive VSG genes in ES 3, 4, 5, 7, 11, 13 and 15. Relative interaction frequencies between the viewpoint and the SL-RNA locus on the right arm of chr. 9 is plotted. Bin size 20 kb. The analyses in **a-b** are based on Hi-C experiments with *VSG-2* expressing cells ( $n=2$ , average interaction frequencies are shown). **c**, Immunofluorescence-based colocalisation studies of tSNAP<sup>myc</sup> (SL-RNA locus marker – SL-RNA transcription compartment) and a nucleolar and active-*VSG* transcription compartment marker (Pol I, largest subunit) using super resolution microscopy. The stacked bar graph depicts proportions of G1 or S phase nuclei with overlapping, adjacent or separate signals for the SL-RNA and *VSG* transcription compartments. Values are averages of three independent experiments and representative of two independent biological replicates ( $\geq 100$  G1 or S phase nuclei); error bars, SD. Detailed  $n$  and  $p$  values are provided in Data S1 sheet 3. DNA was counter-stained with DAPI; the images correspond to maximal 3D projections of stacks of 0.1  $\mu\text{m}$  slices; scale bars 2  $\mu\text{m}$ . N, nucleus; K, kinetoplast (mitochondrial genome).

169 To determine whether the interaction with the SL-RNA transcription compartment is  
170 specific for the active *VSG* gene, and therefore changes following a *VSG* switching event, we  
171 performed Hi-C experiments using an isogenic *T. brucei* cell line expressing a different *VSG*  
172 isoform, *VSG-13* (Fig. 2a)<sup>19</sup>. *VSG-13* resides within expression site 17, which is located on

173 one of five intermediate-sized chromosomes. The presence of co-transcribed resistance  
174 markers upstream of *VSG-2* in expression site 1 and *VSG-13* in expression site 17 allowed us  
175 to specifically select for parasites expressing *VSG-13* through drug selection (**Fig. 2a**). The  
176 exclusive activity of expression site 1 or 17 was verified by RNA-seq (**Fig. 2a**).

177 Hi-C analysis revealed that *VSG-2* - SL-RNA interactions dropped 20-fold to average  
178 inter-chromosomal interaction levels in parasites expressing *VSG-13*, while interactions  
179 between the newly activated *VSG-13* and the SL-RNA locus increased 36-fold (**Fig. 2b, left**  
180 **and middle panel**). We found that upon activation of each expression site, the bin harboring  
181 the respective active VSG gene displayed the strongest interaction with the SL-RNA locus,  
182 suggesting that the VSG gene itself, not its promoter, interacts with the splicing locus (**Fig.**  
183 **2c**). In addition, we detected decreased interaction of the inactivated *VSG-2* gene with the  
184 transcribed chromosome cores, while the activated *VSG-13* gene displayed increased  
185 interaction with chromosome cores (**Extended Data Fig. 2a**). This observation indicates that  
186 activation of a VSG gene is intimately linked to a transition from a silent to an actively  
187 transcribed compartment within the nucleus. Conversely, VSG gene inactivation results in a  
188 transition from an active to an inactive nuclear compartment.

189 To further explore the relationship between SL-RNA interaction frequency and gene  
190 expression, we performed Hi-C analyses using insect stage parasites that do not express any  
191 VSGs, but instead express a different group of surface antigens called procyclin genes.  
192 Confirming the importance of the SL-RNA interaction, the GPEET and EP1 procyclin genes  
193 displayed increased interaction frequency with the SL-RNA locus upon activation in insect  
194 stage cells (**Fig. 2b, right panel, and Extended Data Fig. 2b**). Like VSG genes, procyclin  
195 genes are transcribed by RNA Pol I at high levels and require efficient *trans*-splicing for mRNA  
196 maturation. Thus, Hi-C analyses of *T. brucei* cell lines expressing different antigens indicate  
197 that interactions with the SL-RNA locus are dynamic and specific for the actively transcribed  
198 antigen coding genes.

199



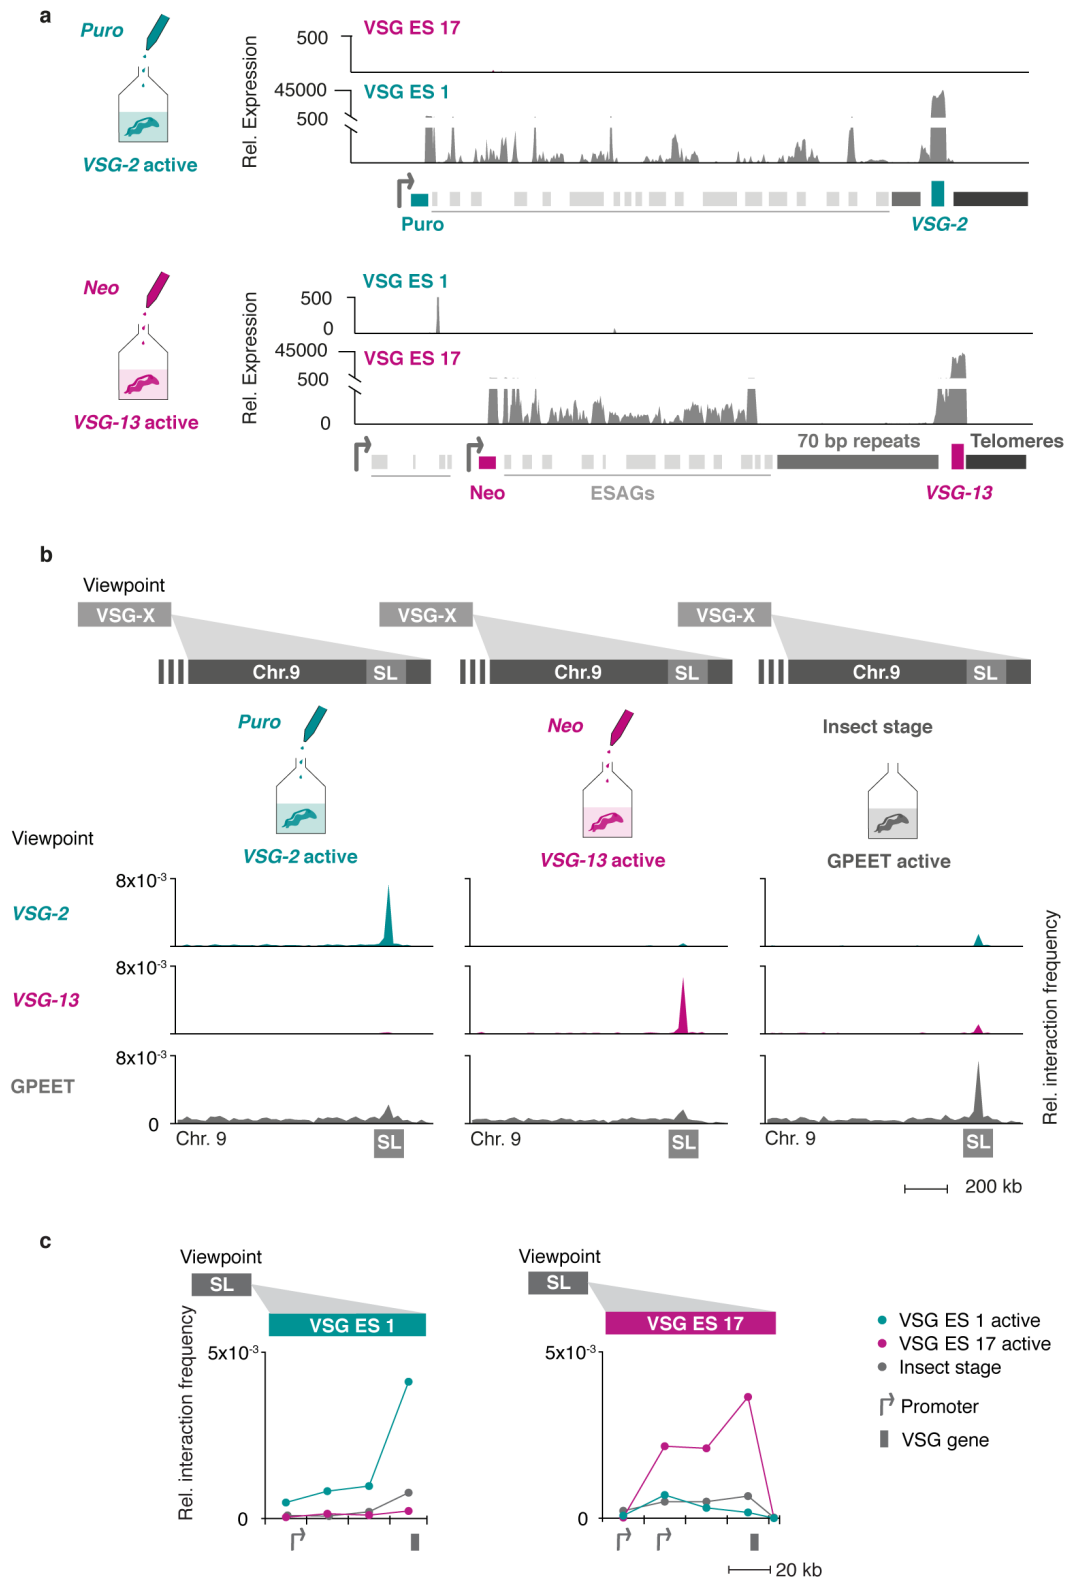

200 **Fig. 2: The interaction between the active VSG gene and the SL-RNA locus is dynamic and changes during**  
 201 **a switch in VSG expression. a,** Transcriptome analyses of isogenic cell lines after selection with puromycin  
 202 (active: *VSG-2*), top panel, or neomycin (active: *VSG-13*), bottom panel. For each condition, the average of three  
 203 biological replicates is plotted. **b,** Hi-C (virtual 4C) analysis, viewpoints: *VSG-2*, *VSG-13*, GPEET gene array (chr.  
 204 6). Relative interaction frequencies between the viewpoint and the SL-RNA locus on chr. 9 are plotted. Bin size 20  
 205 kb. **c,** Hi-C (virtual 4C) analysis, viewpoint: SL-RNA locus (chr. 9). Relative interaction frequencies between the  
 206 viewpoint and VSG ES 1 or ES 17 are shown. Bin size 20 kb. The analyses in **b** and **c** are based on Hi-C  
 207 experiments with cells expressing *VSG-2*, *VSG-13* or insect stage cells expressing procyclin genes (n=2, the  
 208 average is shown).

209           Previously, we had shown that the bipartite VEX-complex is associated with the  
210 actively transcribed VSG gene and maintains monogenic VSG expression but that VEX1 and  
211 VEX2 only partially overlap each other <sup>16</sup>. Given a similar juxtaposition of the VSG transcription  
212 and the SL-RNA transcription compartments, we sought to investigate the relationship  
213 between the VEX complex and these transcription compartments in more detail. Using  
214 optimized immunofluorescence staining protocols and super-resolution microscopy, we were  
215 able to detect two VEX1 foci in the majority of G1 cells (55 +/-4 %). These VEX1 signals  
216 specifically co-localized with the SL-RNA transcription compartments (**Fig. 3a**). In contrast,  
217 the majority of G1 cells (97 +/-1 %) only had one VEX2 focus, which specifically co-localized  
218 with the VSG transcription compartment (**Fig. 3b**). As expected, one VEX1 focus was adjacent  
219 to the VSG transcription compartment (**Extended Data Fig. 3a**) while the VEX2 focus was  
220 adjacent to one of the two SL-RNA transcription compartments (**Extended Data Fig. 3b**).  
221 Thus, our IFAs revealed association of VEX1 with the SL-RNA transcription compartments  
222 and VEX2 with the VSG transcription compartment. To verify a specific interaction between  
223 VEX1 and the SL-RNA locus, we reanalyzed published VEX1-ChIP-seq data, previously only  
224 mapped to VSG expression sites <sup>16</sup>. The ChIP-seq data revealed a striking enrichment of  
225 VEX1 at the SL-RNA locus that was greater than at any other gene, including the active VSG  
226 gene (**Fig. 3c, Extended Data Fig. 3c; Data S1, sheet 1**). These data suggest that the VEX-  
227 complex connects the VSG and SL-RNA transcription compartments.

228           Although VSG and SL-RNA transcription compartments separate during S phase (**Fig.**  
229 **1c**), VEX1 does not separate from the SL-RNA transcription compartment and VEX2 does not  
230 separate from the VSG transcription compartment (**Fig. 3a and b**). Also, consistent with the  
231 loss of VSG expression in insect-stage cells, SL-RNA transcription compartments can still be  
232 identified through tSNAP localisation, while the VEX and VSG transcription compartments are  
233 reorganized and lost, respectively (**Extended Data Fig. 3d-e**). These results indicate that  
234 VEX2 marks the VSG transcription compartment in a developmental stage specific manner,

235 which in bloodstream stage cells may facilitate the re-establishment of compartment  
 236 connectivity to propagate expression of a specific antigen. Consistent with this idea, VEX  
 237 complex reassembly after DNA replication is dependent upon CAF-1 histone chaperone  
 238 function<sup>16</sup>.

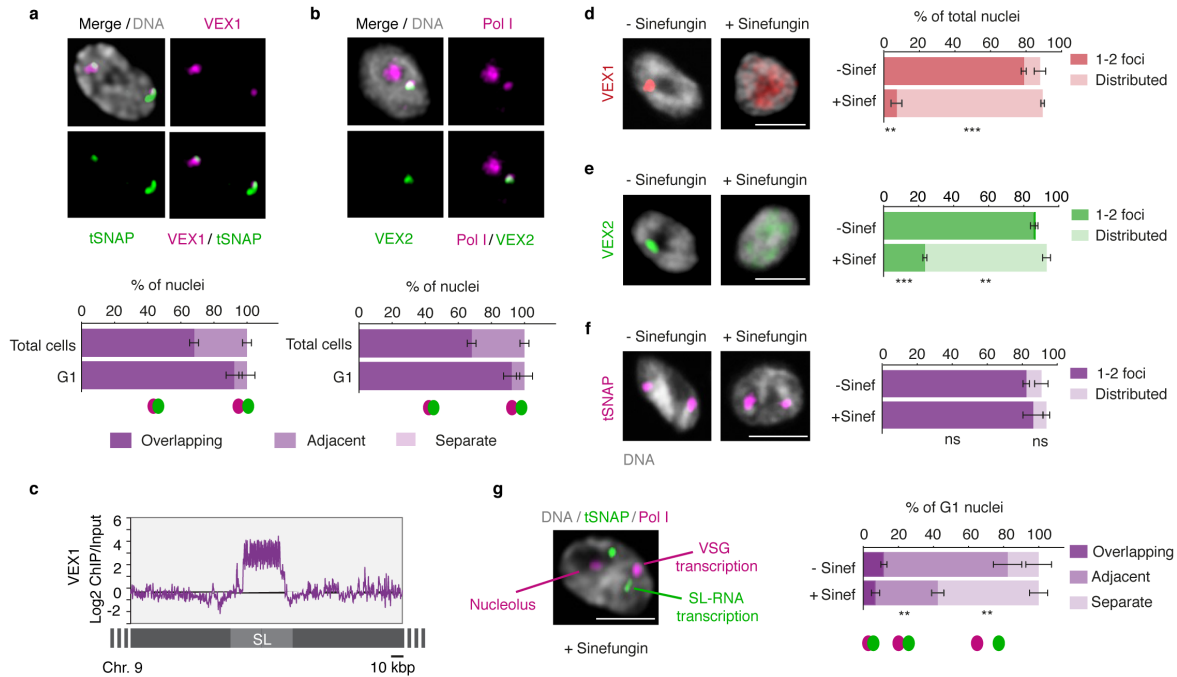

239 **Fig. 3: The VEX complex associates with both the active-VSG and the Spliced Leader (SL)-locus in a**  
 240 **splicing-dependent manner.** **a-b**, Immunofluorescence-based colocalisation studies of VEX1<sup>myc</sup> / tSNAP<sup>GFP</sup> and  
 241 <sup>GFP</sup>VEX2 / Pol I. tSNAP and Pol I are used as markers for the SL-RNA and VSG transcription compartments,  
 242 respectively. The stacked bar graphs depict proportions of nuclei with overlapping, adjacent or separate signals;  
 243 values are averages of four (**a**) or two (**b**) independent experiments ( $\geq 200$  nuclei for total cell counts;  $\geq 100$  nuclei  
 244 for G1 phase). **c**, VEX1<sup>myc</sup> chromatin immunoprecipitation followed by next generation sequencing (ChIP-Seq)  
 245 analysis. The graph depicts log<sub>2</sub> fold change of ChIP signal versus input sample across the SL-RNA locus. Bin  
 246 size 300 bp. **d-f**, Immunofluorescence analysis of VEX1<sup>myc</sup> (**d**), <sup>myc</sup>VEX2 (**e**) and tSNAP<sup>myc</sup> (**f**) before and after  
 247 sinefungin treatment (5  $\mu\text{g ml}^{-1}$  for 30 min at 37°C). Cells displaying no detectable signal ( $< 10\%$ ) were excluded.  
 248 Values are averages of two independent experiments ( $\geq 200$  nuclei each). **g**, Immunofluorescence-based  
 249 colocalisation studies of the SL-RNA transcription (tSNAP<sup>myc</sup>) and the VSG transcription (Pol I, large subunit)  
 250 compartments following treatment with sinefungin. The stacked bar graph depicts proportions of G1 nuclei with  
 251 overlapping, adjacent or separate signals and values are averages of two independent experiments and two  
 252 biological replicates ( $\geq 100$  G1 nuclei). The studies in **a-b** / **d-g** were undertaken using super resolution microscopy  
 253 and the images correspond to maximal 3D projections of stacks of 0.1  $\mu\text{m}$  slices; DNA was counter-stained with  
 254 DAPI; scale bars 2  $\mu\text{m}$ . In **d-g**, a two-tailed paired Student's *t*-test was used to compare non-treated versus treated  
 255 nuclei for each category: ns, non-significant; \*\*,  $p < 0.01$ ; \*\*\*,  $p < 0.001$ . Experiments in **a-b** / **d-g** are representative  
 256 of at least two independent biological replicates and detailed *n* and *p* values are provided in Data S1 sheet 3.  
 257

258  
 259 Given the close spatial proximity between the site of VSG transcription and the site of  
 260 SL-RNA transcription, we next questioned whether the splicing process itself impacts the  
 261 connection between these compartments. We found that inhibition of *trans*-splicing with  
 262 sinefungin<sup>20</sup> disrupted both VEX1 (**Fig. 3d**) and VEX2 (**Fig. 3e**) localization within 30 min,

263 while the tSNAP transcription factor was not affected under the same conditions (**Fig. 3f**).  
264 Notably, inhibition of splicing by sinefungin also disrupted the connection between the VSG  
265 and SL-RNA transcription compartments, revealed by separation of the Pol I and tSNAP  
266 signals (**Fig. 3g**); neither the VEX, nor the tSNAP protein levels were affected by sinefungin  
267 treatment (**Extended Data Fig.3f**). Thus, VEX protein localization and the juxtaposition of the  
268 VSG and the SL-RNA transcription compartments are dependent on mRNA splicing activity.

269 Next, we aimed to investigate the mechanism by which the VEX complex ensures  
270 monogenic VSG expression. Previously, we found that VEX2 depletion leads to a strong  
271 activation of VSG genes located in previously silent expression sites<sup>16</sup>. Thus, following our  
272 observation that the VEX-complex spans the VSG transcription and the SL-RNA transcription  
273 compartments, we sought to determine whether VEX2 functions as a connector or as an  
274 exclusion factor. That is, whether following VEX2 depletion the active VSG gene loses  
275 connectivity to the SL-RNA transcription compartment or whether previously inactive  
276 expression sites start to interact with the SL-RNA transcription compartment. To test these  
277 models, we analyzed the distance between the VSG transcription compartment and the SL-  
278 RNA transcription compartment following depletion of VEX-complex components (**Extended**  
279 **Data Fig. 4a-b**). IFA data revealed a disruption of compartment connectivity in 45% of G1  
280 nuclei following 12 hours of VEX2 knockdown ( $P < 0.001$ ) and 60% following VEX1 - VEX2  
281 double-knockdown ( $P < 0.01$ ) (**Fig. 4a, Extended Data Fig. 4c**); the mean sub-compartment  
282 distances were 60 nm in control cells and 167 nm following VEX-complex knockdown (**Fig.**  
283 **4a-b, Extended Data Fig. 4d**). At later time points after the induced VEX2 knock down, the  
284 RNA Pol I signal disperses<sup>18</sup>, indicating that VEX2 sustains a local reservoir of Pol I at the  
285 active VSG gene. Compartment connectivity was not significantly disrupted following VEX1-  
286 knockdown.

287

288

289

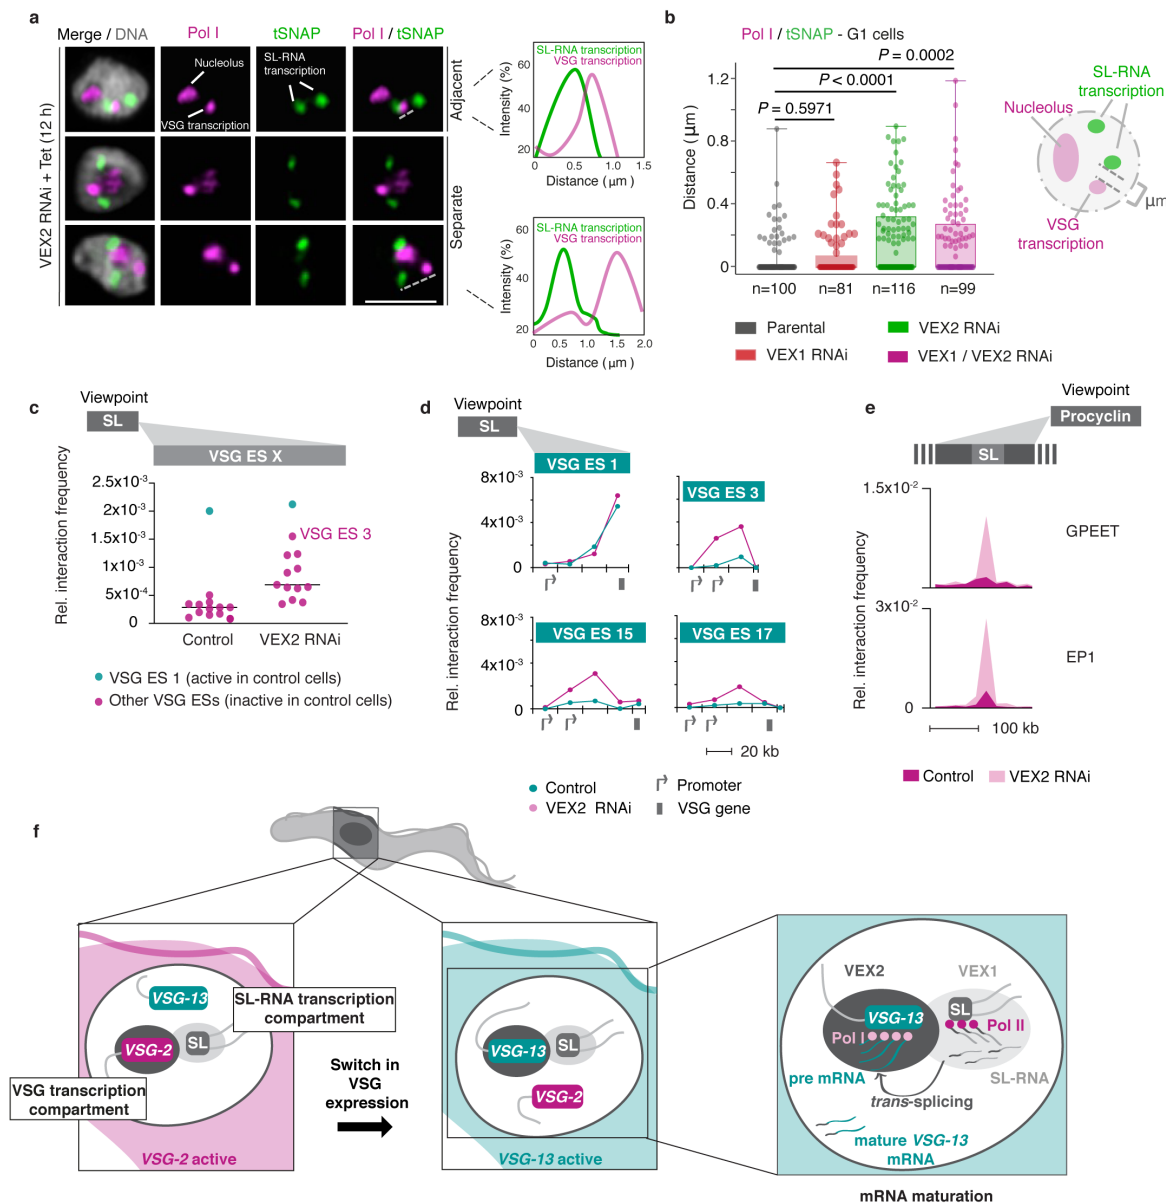

290  
 291 **Fig. 4: The exclusive association between the active VSG and the SL-locus is VEX2-dependent.** a-b,  
 292 Immunofluorescence and super resolution microscopy based colocalisation studies of tSNAP<sup>myc</sup> (SL-RNA  
 293 transcription compartment) and Pol I (nucleolus and active-VSG transcription compartment) following VEX1, VEX2  
 294 and VEX1/VEX2 knockdown. **a**, Representative images, all nuclei are G1. On the right-hand side, two  
 295 representative histograms depict the distribution of signal intensity across the distance indicated by the dashed  
 296 lines. Images correspond to maximal 3D projections of stacks of 0.1  $\mu\text{m}$  slices; DNA was counter-stained with  
 297 DAPI; scale bars 2  $\mu\text{m}$ . **b**, The box plot depicts the distance between the active-VSG and the nearest SL-RNA  
 298 transcription compartment ( $\geq 81$  G1 nuclei) following VEX1, VEX2 and VEX1/VEX2 knockdown; the centre lines  
 299 show the medians; box limits indicate the 25th and 75th percentiles; whiskers extend from maximal to the minimal  
 300 values; all data points are shown. The distances for each knockdown condition were compared to the parental cell  
 301 line using a two-tailed unpaired Student's *t*-test. **c**, Hi-C (virtual 4C) analysis, viewpoint: SL-RNA locus (chr. 9).  
 302 Relative interaction frequencies between the viewpoint and the VSG expression sites are shown before and after  
 303 VEX2 knockdown. Each dot represents the average value for one expression site. Bin size 20 kb. **d**, Virtual 4C  
 304 analysis, viewpoint: SL-RNA locus (chr. 9). Relative interaction frequencies between the viewpoint and VSG  
 305 expression sites is shown. Bin size 20 kb. **e**, Virtual 4C analysis, viewpoint: EP1 (chr. 10) or GPEET gene array  
 306 (chr. 6). Relative interaction frequencies between the viewpoint and the SL-RNA locus are plotted. Bin size 20 kb.  
 307 The analyses in **c** to **e** are based on Hi-C experiments with cells before and 24 h after VEX2 knockdown (n=3, the  
 308 average is shown). **f**, Schematic model for monogenic VSG expression. A strong inter-chromosomal interaction  
 309 between the SL-array and the active VSG gene facilitates spatial integration of transcription and mRNA maturation.  
 310 VEX1 and VEX2 are primarily SL- and active-VSG associated, respectively, and sustain monogenic VSG  
 311 expression by excluding other VSGs. The VSG-SL organelle is reconfigured upon activation of a different VSG.

312

313 To explore the role of VEX2 in controlling interactions between antingcoding genes  
314 and SL-RNA loci, we performed Hi-C analyses in VEX2-depleted cells. After 24 hours of VEX2  
315 depletion, all previously silent expression sites displayed increased interaction frequencies  
316 with the SL-RNA locus. (**Fig. 4c**). The interaction between VSG expression site 3 and the SL-  
317 RNA locus showed the strongest increase. Notably, this is the expression site containing the  
318 most de-repressed VSG (*VSG-6*) following VEX2 depletion <sup>16</sup>. Interaction frequencies of the  
319 active VSG expression site 1 with the SL-RNA locus remained unchanged, correlating with  
320 sustained and dominant *VSG-2* expression. Overall, SL-RNA interactions correlate with VSG  
321 transcript levels before and after VEX2 knockdown (**Extended Data Fig. 5a**).

322 Besides the VSG genes located in previously silent expression sites, expression site  
323 associated genes were also strongly upregulated following VEX2 knockdown <sup>16</sup>. In line with  
324 this finding, we observed the largest increase in SL-RNA interactions for the regions upstream  
325 of the VSG gene in each de-repressed expression site, where expression site associated  
326 genes are located (**Fig. 4d, Extended Data Fig. 5b**). Thus, VEX2 restricts interactions  
327 between silent VSG expression sites, the expression site associated genes in particular, and  
328 the SL-RNA locus.

329 As a third group of RNA Pol I transcribed genes, insect stage specific procyclin genes  
330 are upregulated upon VEX2 depletion <sup>16</sup>. Correlating with these data, following VEX2-  
331 knockdown, we found GPEET and EP1 procyclin genes to exhibit strongly increased  
332 interaction frequencies with the SL-RNA array and also with VSG expression sites (**Fig. 4e,**  
333 **Extended Data Fig. 5c**). Thus, our data suggest that VEX2 may have a dual function:  
334 specifically enhancing mRNA splicing of the VSG gene that is connected to the SL-RNA  
335 transcription compartment and, at the same time, excluding all other VSG expression sites  
336 and procyclin genes from the SL-RNA compartment to ensure monogenic VSG expression.

337 By combining proximity ligation and super-resolution microscopy, we were able to  
338 demonstrate spatial integration of the active VSG expression site and a genomic locus

339 important for RNA maturation. Our data show that this supramolecular assembly is composed  
340 of a VSG transcription compartment with the active VSG gene, RNA Pol I and VEX2 and an  
341 SL-RNA transcription compartment with the SL-RNA array, RNA Pol II, VEX1 and the tSNAP  
342 complex, presumably together with other factors important for mRNA *trans*-splicing<sup>18</sup>. Based  
343 on these findings we propose a model in which VSG choice is intimately associated with an  
344 inter-chromosomal interaction, bringing together two nuclear compartments to ensure efficient  
345 VSG mRNA processing at only one expression site (**Fig. 4f**). In the VSG transcription  
346 compartment, the VSG gene is transcribed by highly processive RNA Pol I, generating large  
347 amounts of VSG pre-mRNA that requires efficient processing to prevent premature  
348 degradation. In the SL-RNA transcription compartment, SL-RNA, an essential substrate for  
349 maturation of every mRNA, is produced. The close spatial proximity of the two compartments  
350 in a single locus provides a sufficiently high concentration of *trans*-splicing substrate to ensure  
351 the efficient maturation of highly abundant VSG transcripts. According to this model, VEX2 is  
352 the key molecule bridging the two compartments and excluding all but one VSG expression  
353 site from the SL-RNA transcription compartment, thereby ensuring expression of a single VSG  
354 gene per cell.

355 RNA processing as the limiting factor in monogenic VSG expression has been  
356 proposed previously, based on the observations that all VSG expression site promoters are  
357 active, yet processive polycistronic transcription and mature transcripts are specific to the  
358 single active expression site<sup>6,7</sup>. Given the observation that co-transcriptional RNA processing  
359 can affect elongation rates in other organism<sup>21</sup>, it will be interesting to determine whether  
360 efficient VSG mRNA processing will exert a positive feedback on transcription elongation  
361 along expression sites. Also, it was shown recently that splicing can activate transcription<sup>22</sup>.  
362 It remains to be shown if factors located in the SL-RNA transcription compartment recruit the  
363 transcription machinery to the interacting VSG expression site and thereby enhance  
364 transcription. Notably, we also find other highly expressed housekeeping genes, such as core

365 histones or tubulin, to associate with the SL-RNA locus (**Extended Data Fig. 6a**) and with VEX1  
366 (**Extended Data Fig. 6b**). Thus, interactions with the SL-RNA locus may play a broader role for  
367 the regulation of gene expression in *T. brucei*.

368 While the importance of intra-chromosomal interactions in regulating gene expression  
369 has been shown in many complex eukaryotes, the significance of inter-chromosomal  
370 interactions has been questioned. Interactions between different chromosomes were thought  
371 to require complicated, possibly error-prone mechanisms to be re-established following  
372 mitosis. Yet, our data demonstrate a stable interaction between the active VSG gene, located  
373 either on chr. 6 or on an intermediate-sized chromosome, and the SL-RNA array locus on chr.  
374 9. The interaction is also stably propagated during cell-division; despite being resolved during  
375 S phase, the interaction is re-established after replication. To our knowledge, these findings  
376 represent the first report of a selective inter-chromosomal interaction that connects  
377 transcription and mRNA splicing.

378 Protein condensates have recently emerged as important features that  
379 compartmentalize nuclear functions; transcription control by RNA polymerases, for example  
380 <sup>23</sup>. Regulated switching between adjacent transcriptional and splicing condensates has been  
381 described in mammalian cells <sup>24</sup> and RNAs are major actors in facilitating genomic interactions  
382 and phase transitions <sup>25</sup>. Given the recent finding that members of a family of helicases are  
383 global regulators of RNA-containing, phase-separated organelles <sup>26</sup>, it is tempting to speculate  
384 that maintenance of VSG transcription-maturation compartment connectivity is similarly  
385 regulated by the putative RNA helicase VEX2 <sup>16</sup>. We show here that in *T. brucei*, the assembly  
386 of two membrane-less nuclear condensates, each with a specific function in VSG gene  
387 transcription and RNA maturation, and both containing protein and RNA molecules <sup>12,18</sup>,  
388 regulates monogenic VSG expression. By shaping a highly selective and specific genome  
389 architecture, VEX2 allows only one VSG gene to productively interact with the mRNA splicing  
390 compartment.



391 **Acknowledgements:** We thank the Dundee Imaging Facility and J. Rouse for access to the  
392 Zeiss 880 Airyscan and Leica Confocal SP8 Hyvolution microscope, respectively, and S.  
393 Alford (London School of Hygiene & Tropical Medicine) for the SNAP42 tagging construct.  
394 We further thank R. Cosentino and all members of the Siegel, Ladurner, Meissner and Boshart  
395 labs for valuable discussion, T. Straub (Core facility Bioinformatics, BMC) for providing server  
396 space and help with the data analysis, the Core Unit Systems Medicine, University of  
397 Würzburg for NGS.

398

399 **Funding:** The work was funded by a Wellcome Trust Investigator Award to D.H.  
400 [100320/Z/12/Z], by the German Research Foundation [SI 1610/3-1], the Center for Integrative  
401 Protein Science (CIPSM) and by an ERC Starting Grant [3D\_Tryps 715466]. The University  
402 of Dundee Imaging Facility is supported by the MRC Next Generation Optical Microscopy  
403 award [MR/K015869/1]. L.S.M.M. was supported by a grant of the German *Excellence*  
404 *Initiative* to the Graduate School of Life Science, University of Würzburg.

405

406 **Author contributions:** Experiments were designed by J.F., V.L., L.S.M.M., D.H. and T.N.S.  
407 and carried out by J.F., V.L. and L.S.M.M., unless indicated otherwise. Initial IFA experiments  
408 were performed by L.G.. RNAi, chemical inhibition and super resolution and other microscopy  
409 experiments were performed and analysed by J.F.. Hi-C experiments were performed by V.L.  
410 and L.S.M.M. and computational analysis was carried out by B.G.B., V.L. and L.S.M.M.. RNA-  
411 seq experiments were performed by V.L.; data analysis was carried out by V.L. and B.G.B..  
412 ChIP-seq data analysis was carried out by S.H.. Funding was acquired by D.H. and T.N.S..  
413 The work was supervised by D.H. and T.N.S.. The manuscript was written by J.F., V.L., D.H.  
414 and T.N.S. and edited by all other co-authors.

415

416 **Competing interests:** The authors declare that they have no competing interests.

417 **Data and materials availability:** Code and high-throughput sequencing data generated for  
418 this study have been deposited at GitHub (<https://github.com/bgbrink/PRJEB35632>) and in  
419 the European Nucleotide Archive (ENA) under primary accession number PRJEB35632,  
420 respectively. ChIP-seq data have also been deposited in the ENA (accession no.  
421 PRJEB25352). Processed data and results are available under  
422 <https://doi.org/10.5281/zenodo.3628213>.

423

424

## 425 **References:**

426

- 427 1 Bashkirova, E. & Lomvardas, S. Olfactory receptor genes make the case for inter-  
428 chromosomal interactions. *Curr Opin Genet Dev* **55**, 106-113 (2019).
- 429 2 Deitsch, K. W., Lukehart, S. A. & Stringer, J. R. Common strategies for antigenic  
430 variation by bacterial, fungal and protozoan pathogens. *Nat Rev Microbiol* **7**, 493-503  
431 (2009).
- 432 3 Aresta-Branco, F., Erben, E., Papavasiliou, F. N. & Stebbins, C. E. Mechanistic  
433 similarities between antigenic variation and antibody diversification during  
434 *Trypanosoma brucei* infection. *Trends Parasitol* **35**, 302-315 (2019).
- 435 4 Horn, D. Antigenic variation in African trypanosomes. *Mol Biochem Parasitol* **195**,  
436 123-129 (2014).
- 437 5 Muller, L. S. M. *et al.* Genome organization and DNA accessibility control antigenic  
438 variation in trypanosomes. *Nature* **563**, 121-125 (2018).
- 439 6 Kassem, A., Pays, E. & Vanhamme, L. Transcription is initiated on silent variant  
440 surface glycoprotein expression sites despite monoallelic expression in  
441 *Trypanosoma brucei*. *Proc Natl Acad Sci U S A* **111**, 8943-8948 (2014).
- 442 7 Vanhamme, L. *et al.* Differential RNA elongation controls the variant surface  
443 glycoprotein gene expression sites of *Trypanosoma brucei*. *Mol Microbiol* **36**, 328-  
444 340 (2000).
- 445 8 Michaeli, S. *Trans*-splicing in trypanosomes: machinery and its impact on the  
446 parasite transcriptome. *Future Microbiol* **6**, 459-474 (2011).
- 447 9 Bertero, A. *et al.* Dynamics of genome reorganization during human cardiogenesis  
448 reveal an RBM20-dependent splicing factory. *Nat Commun* **10**, 1538 (2019).
- 449 10 Khanna, N., Hu, Y. & Belmont, A. S. HSP70 transgene directed motion to nuclear  
450 speckles facilitates heat shock activation. *Curr Biol* **24**, 1138-1144 (2014).
- 451 11 Navarro, M. & Gull, K. A pol I transcriptional body associated with VSG mono-allelic  
452 expression in *Trypanosoma brucei*. *Nature* **414**, 759-763 (2001).

- 453 12 Budzak, J. *et al.* Dynamic colocalization of 2 simultaneously active VSG expression  
454 sites within a single expression-site body in *Trypanosoma brucei*. *Proc Natl Acad Sci*  
455 *U S A* **116**, 16561-16570 (2019).
- 456 13 Chaves, I. *et al.* Subnuclear localization of the active variant surface glycoprotein  
457 gene expression site in *Trypanosoma brucei*. *Proc Natl Acad Sci U S A* **95**, 12328-  
458 123338 (1998).
- 459 14 Schoenfelder, S. & Fraser, P. Long-range enhancer-promoter contacts in gene  
460 expression control. *Nat Rev Genet* **20**, 437-455 (2019).
- 461 15 Glover, L., Hutchinson, S., Alsford, S. & Horn, D. VEX1 controls the allelic exclusion  
462 required for antigenic variation in trypanosomes. *Proc Natl Acad Sci U S A* **113**,  
463 7225-7230 (2016).
- 464 16 Faria, J. *et al.* Monoallelic expression and epigenetic inheritance sustained by a  
465 *Trypanosoma brucei* variant surface glycoprotein exclusion complex. *Nat Commun*  
466 **10**, 3023 (2019).
- 467 17 Zheng, Y., Ay, F. & Keles, S. Generative modeling of multi-mapping reads with mHi-  
468 C advances analysis of Hi-C studies. *Elife* **8** (2019).
- 469 18 Hury, A., Goldshmidt, H., Tkacz, I. D. & Michaeli, S. Trypanosome spliced-leader-  
470 associated RNA (SLA1) localization and implications for spliced-leader RNA  
471 biogenesis. *Eukaryot Cell* **8**, 56-68 (2009).
- 472 19 Figueiredo, L. M., Janzen, C. J. & Cross, G. A. A histone methyltransferase  
473 modulates antigenic variation in African trypanosomes. *PLoS Biol* **6**, e161 (2008).
- 474 20 McNally, K. P. & Agabian, N. *Trypanosoma brucei* spliced-leader RNA methylations  
475 are required for *trans* splicing *in vivo*. *Mol Cell Biol* **12**, 4844-4851 (1992).
- 476 21 Kornblihtt, A. R., de la Mata, M., Fededa, J. P., Munoz, M. J. & Nogues, G. Multiple  
477 links between transcription and splicing. *Rna* **10**, 1489-1498 (2004).
- 478 22 Fiszbein, A., Krick, K. S., Begg, B. E. & Burge, C. B. Exon-mediated activation of  
479 transcription starts. *Cell* **179**, 1551-1565 (2019).
- 480 23 Hnisz, D., Shrinivas, K., Young, R. A., Chakraborty, A. K. & Sharp, P. A. A phase  
481 separation model for transcriptional control. *Cell* **169**, 13-23 (2017).
- 482 24 Guo, Y. E. *et al.* Pol II phosphorylation regulates a switch between transcriptional  
483 and splicing condensates. *Nature* **572**, 543-548 (2019).
- 484 25 Li, X. & Fu, X. D. Chromatin-associated RNAs as facilitators of functional genomic  
485 interactions. *Nat Rev Genet* **20**, 503-519 (2019).
- 486 26 Hondele, M. *et al.* DEAD-box ATPases are global regulators of phase-separated  
487 organelles. *Nature* **573**, 144-148 (2019).

488

489

490

491 **Methods:**

492 No statistical methods were used to predetermine sample size. The experiments were not  
493 randomized and investigators were not blinded to allocation during experiments and outcome  
494 assessment.

495

496 ***T. brucei* growth and manipulation.** Bloodstream-form *T. brucei*, Lister 427 and 2T1 cells <sup>27</sup>,  
497 both wild-type with respect to VEX1, VEX2 and SNAP42 subunits, were grown in HMI-11  
498 medium and genetically manipulated using electroporation <sup>28</sup>; cytomix was used for all  
499 transfections. Puromycin, phleomycin, hygromycin and blasticidin were used at 2, 2, 2.5 and  
500 10  $\mu\text{g ml}^{-1}$  for selection of recombinant clones; and at 1, 1, 1 and 2  $\mu\text{g ml}^{-1}$  for maintaining  
501 those clones, respectively. RNAi experiments were undertaken through tetracycline induction  
502 at 1  $\mu\text{g ml}^{-1}$ . A double selection *T. brucei* cell line was used that derived from the Lister 427  
503 bloodstream-form MITat 1.2 isolate <sup>19</sup>. A neomycin resistance gene in VSG expression site 17  
504 and a puromycin resistance gene in VSG expression site 1 allowed the selection for a  
505 homogenous cell population that either expressed *VSG-2* from expression site 1 or *VSG-13*  
506 from expression site 17. Cells were cultivated with either 10  $\mu\text{g ml}^{-1}$  of neomycin (also referred  
507 to as N50 cells) or 0.1  $\mu\text{g ml}^{-1}$  of puromycin (referred to as P10 cells). Established procyclic-  
508 form *T. brucei*, Lister 427 cells were grown in SDM-79 at 27 °C and genetically manipulated  
509 using electroporation as above. Blasticidin or hygromycin were used at 10 or 50 and 2 or 1  $\mu\text{g}$   
510  $\text{ml}^{-1}$  for selection and maintenance, respectively.

511

512 **Plasmids.** The VEX1 (Tb927.11.16920, 574 bp) <sup>15</sup>, VEX2 (Tb927.11.13380, 471 bp) <sup>16</sup> and  
513 VEX1/VEX2 <sup>16</sup> RNAi cassettes were excised prior to electroporation by digesting with *Ascl*.  
514 The VEX1<sup>12myc</sup> <sup>15</sup> and SNAP42<sup>12myc</sup> <sup>29</sup> C-terminal tagging vectors were linearised with *SphI*.  
515 The <sup>6myc</sup>VEX2 and <sup>GFP</sup>VEX2 N-terminal tagging vectors were linearised with *XhoI*. The  
516 SNAP42 GFP C-terminal tagging vector was made by replacing the 12 x c-myc tag and as

517 also linearised with *SphI*, respectively. Linearised RNAi constructs, under the control of  
518 tetracycline-inducible promoters, were transfected into 2T1 cells, which allow for targeting to  
519 a single genomic locus validated for robust inducible expression <sup>27</sup>.

520

521 **ChIP-seq.** ChIP-Seq was carried out as described in <sup>16</sup>. Reads were aligned to the 11 curated  
522 megabase chromosomes from the TREU927 strain genome sequence <sup>30</sup>, and a non-  
523 redundant set of BES and mVSG contigs from the Lister 427 strain <sup>31-33</sup> using bowtie2 <sup>34</sup> in  
524 very-sensitive alignment mode, and alignments were compressed and sorted using  
525 samtools <sup>35</sup>. Bowtie2 attempted to align 54.0 and 49.9 million read pairs with 70.84 and 82.43  
526 % success rates, respectively, resulting in 38.3 and 41.1 million aligned read pairs. PCR  
527 duplicate reads were removed using Picard MarkDuplicates  
528 (<http://broadinstitute.github.io/picard/>) resulting in 26.8 and 41.3 million aligned read pairs for  
529 analysis. Alignments were visually inspected with the Artemis genome browser <sup>36</sup>. Circular  
530 plots (**Extended Data Fig. 3c**) were generated using the R library circlize <sup>37</sup> and bedgraph  
531 files for log<sub>2</sub> fold change (**Fig. 3c, Extended Data Fig. 3c and Extended Data Fig. 6b**) were  
532 generated using deeptools2 <sup>38</sup>. Bedgraphs were generated with 1kb bins and the option  
533 smoothLength 5000. Spliced leader RNA sequences were annotated using the sequences:  
534 Promoter:CGTTTCTGGCACGACAGTAAAATATGGCAAGTGTCTCAAACACTGCCTGTACA  
535 GCTTATTTTTGGGACACACCCATGCTTTC...Transcript...AACTAACGCTATTATTAGAACA  
536 GTTTCTGTACTIONTATTGGTATGAGAAGCTCCCAGTAGCAGCTGGGCCAACACACGCATT  
537 TGTGCTGTTGGTCCCGCCGCATACTGCGGGAATCTGGAAGGTGGGGTTCGGATGACCT  
538 C and the 'transcript' features were plotted with TSS and TES denoting the 5' and 3'  
539 extremities. Fold enrichment traces covering the spliced leader locus were calculated directly  
540 using deeptools bamCompare. Heat maps (**Extended Data Fig. 3c and Extended Data Fig.**  
541 **6b**) were generated using deeptools2 bamCompare, computeMatrix and plotHeatmap <sup>38</sup>  
542 and resulting vector graphics files were then assembled into figures using Adobe

543 Illustrator. Genomic regions for tandem genes and arbitrarily selected genes with a  
544 paralog count of 0 were assembled in bed files, using annotated mRNA sequences from  
545 TriTrypDB v5.1 of the TREU927 genome sequence. All scripts necessary to reproduce the  
546 ChIP-Seq analyses have been deposited together with the results of those analyses under  
547 <https://doi.org/10.5281/zenodo.3628213>.

548

549 **Protein blotting.** Protein samples were run according to standard protein separation  
550 procedures, using SDS-PAGE. However, for VEX2 detection, the use of Bis-Tris gels with a  
551 neutral pH environment and a Bis-Tris/Bicine based transfer buffer (containing a reducing  
552 agent and 10% methanol) were critical for protein separation and transfer, respectively  
553 (NuPAGE, Invitrogen). Otherwise, western blotting was carried out according to standard  
554 protocols. The following primary antibodies were used: rabbit  $\alpha$ -VEX2 (1:1,000), rabbit  $\alpha$ -pol-  
555 I largest subunit<sup>15</sup> (1:500), rabbit  $\alpha$ -VSG-2 (1:20,000), rabbit  $\alpha$ -VSG-6 (1:20,000), mouse  $\alpha$ -  
556 c-myc (Millipore, clone 4A6, 1:7,000), rabbit  $\alpha$ -GFP (Abcam Ab290, 1:1,000) and mouse  $\alpha$ -  
557 EF1 $\alpha$  (Millipore, clone CBP-KK1, 1:20,000). We used horseradish peroxidase coupled  
558 secondary antibodies ( $\alpha$ -mouse and  $\alpha$ -rabbit, Biorad, 1:2,000). Blots were developed using  
559 an enhanced chemiluminescence kit (Amersham) according to the manufacturer's  
560 instructions. Densitometry was performed using Fiji v. 2.0.0.

561

562 **Microscopy.** Immunofluorescence microscopy was carried out according to standard  
563 protocols. For wide field microscopy (**Extended Data Fig. 4a**), the cells were attached to 12-  
564 well 5 mm slides (Thermo Scientific). For super resolution microscopy, the cells were attached  
565 to poly-L-lysine treated coverslips (thickness 1<sup>1/2</sup> mm), stained and only then mounted onto  
566 glass slides. For colocalisation studies with Pol I we used antigen-retrieval. Prior to  
567 permeabilization, fixed cells were rehydrated in PBS for 5 min at RT, held at 95 °C for 60 s in  
568 freshly prepared antigen retrieval buffer (100 mM Tris, 5% urea, pH 9.5) and then washed 3 x

569 5 min in PBS at RT. Cells were mounted in Vectashield with DAPI (wide field) or stained with  
570  $1 \mu\text{g ml}^{-1}$  DAPI for 10 min and then mounted in Vectashield without DAPI (super resolution).  
571 In *T. brucei*, DAPI-stained nuclear and mitochondrial DNA were used as cytological markers  
572 for cell-cycle stage; one nucleus and one kinetoplast (1N:1K) indicates G1, one nucleus and  
573 an elongated kinetoplast (1N:eK) indicates S phase, one nucleus and two kinetoplasts (1N:2K)  
574 indicates G2/M and two nuclei and two kinetoplasts (2N:2K) indicates post-mitosis <sup>39,40</sup>.  
575 Primary antisera were rat  $\alpha$ -VSG-2 (1:10,000), rabbit  $\alpha$ -VSG-6 (1:10,000), rabbit  $\alpha$ -GFP  
576 (Invitrogen, 1:250; Abcam, 1:500), mouse  $\alpha$ -myc (New England Biolabs, clone 9B11, 1:2,000),  
577 rabbit  $\alpha$ -pol-I largest subunit <sup>15</sup> (1:100) or rabbit  $\alpha$ -NOG1 <sup>41</sup> (1:500). The secondary antibodies  
578 were Alexa Fluor conjugated goat antibodies (Thermo Scientific):  $\alpha$ -mouse,  $\alpha$ -rat and  $\alpha$ -rabbit,  
579 AlexaFluor 488 or Alexa Fluor 568 (1:1,000 or 1:2,000, for super resolution or wide field field  
580 microscopy, respectively). For wide field microscopy, cells were analysed using a Zeiss  
581 Axiovert 200M microscope with an AxioCam MRm camera and the ZEN Pro software (Carl  
582 Zeiss, Germany). The images were acquired as z-stacks (0.1-0.2  $\mu\text{m}$ ) and further deconvolved  
583 using the fast iterative algorithm in Zen Pro. For super resolution microscopy, cells were  
584 analysed using a Leica TCS SP8 confocal laser scanning microscope in Hyvolution Mode and  
585 the Leica Application Suite X (LASX) software (Leica, Germany) or a Zeiss 880 Airyscan and  
586 the Zeiss ZEN software (Carl Zeiss, Germany). The Hyvolution mode allows super resolution  
587 level images, general used settings: highest resolution / lowest speed; pinhole 0.5. All the  
588 super resolution images correspond to maximal 3D projections by brightest intensity of stacks  
589 of approximately 30 slices of 0.1  $\mu\text{m}$  - Images with DNA in grey. For all quantifications, images  
590 were acquired with the same settings and equally processed. All the images were processed  
591 and scored using Fiji v. 2.0.0. <sup>42</sup>. Sinefungin was applied at  $2 \mu\text{g ml}^{-1}$  for 30 minutes at 37°C.  
592 VEX1, VEX2 and tSNAP foci and Pol I nucleolar and ESB signals could be detected in over  
593 85-90% of nuclei. For all experiments involving RNAi, the knockdown was always verified by  
594 Western-Blot and the VSG derepression phenotype confirmed by IFA and/or FACS analysis.

595 Counts in total cells or specific cell cycle phases were performed in >200 or >100 nuclei,  
596 respectively. All quantifications are averages or representative of at least two biological  
597 replicates and independent experiments. For the ESB / tSNAP localisation following VEX2 or  
598 VEX1 / VEX2 RNAi in **Fig. 4a-b and Extended Data Fig. 4c-d**, all the imaging and analysis  
599 was performed at 12 h post induction, a timepoint where there was sufficient VEX2 knockdown  
600 (**Extended Data Fig. 4b**) but both nucleolar Pol I and the ESB could be detected in > 85% of  
601 cells; the ESB is not detectable at later time points<sup>16</sup>. Regarding the distance measurements  
602 between the ESB and tSNAP compartment (**Fig. 4c**), a control measurement (**Extended Data**  
603 **Fig. 4d**) was performed to make sure that the increase in the distance between the two protein  
604 condensates following VEX2 or VEX1 / VEX2 RNAi was not a mere consequence of a  
605 decrease in the ESB focus diameter. Moreover, the ESB / tSNAP localisation analyses  
606 following VEX RNAi or sinefungin treatment were restricted to G1 cells to exclude any cell  
607 cycle bias, as these protein condensates can separate during S phase (**Fig. 1c**).

608  
609 **RNA-Seq. RNA isolation:** The RNA-seq experiment and data analysis was performed as  
610 described previously<sup>43</sup>, using three replicates each for *VSG-2* and *VSG-13* expressing cells.  
611 45 million cells were harvested per replicate at 1,500 x g and 4 °C for 10 min. Cells were  
612 washed with 1× TDB (5 mM KCl, 80 mM NaCl, 1 mM MgSO<sub>4</sub>, 20 mM Na<sub>2</sub>HPO<sub>4</sub>, 2 mM  
613 NaH<sub>2</sub>PO<sub>4</sub>, 20 mM glucose pH 7.4). RNA isolation was performed using the NucleoSpin RNA  
614 kit (Macherey-Nagel; cat. no. 740955.10) according to the manufacturer's instructions with  
615 minor changes. 3.8 μl of 1 M RNase-free dithiothreitol (Sigma-Aldrich; cat. no. 10197777001)  
616 and 1 μl of 1:10 Ambion ERCC RNA Spike-In Mix (ThermoFisherScientific; cat. no. 4456739)  
617 was added to the cell lysis buffer prior to use. **Removal of ribosomal RNA:** rRNA was removed  
618 by hybridization as described previously<sup>43</sup>. All solutions were kept free from nucleases. For  
619 each hybridization reaction, 2 μg of total RNA was mixed with 10 μl of formamide  
620 (SigmaAldrich; cat. no. F9037-100ML), 2.5 μl of 20× SSC (3M NaCl, 0.3M sodium citrate, the



621 pH was adjusted to 7.0 with HCl), 5  $\mu$ l of 0.005 M EDTA pH 8 (stock solution 0.5 M;  
622 ThermoFisherScientific; cat. no. AM9260G), 2.48  $\mu$ l of 100  $\mu$ M rRNA depletion mix (total 4  $\mu$ g  
623 of oligos) and RNase-free water (ThermoFisherScientific; cat. no. AM9938) to a total volume  
624 of 50  $\mu$ l. Hybridization was performed for 5 min at 80  $^{\circ}$ C, ramp down to 25  $^{\circ}$ C at intervals of 5  
625  $^{\circ}$ C per minute. Subsequently, 2  $\mu$ l of RNase-OUT (ThermoFisherScientific; cat. no. 10777019)  
626 and 50  $\mu$ l of 1x SCC containing 20% formamide were added. Dynabead MyOne Streptavidin  
627 C1 beads (ThermoFisherScientific; cat. no. 65001) were prepared as recommended by the  
628 manufacturer for RNA applications and immobilization of nucleic acids. Three rounds of oligo  
629 capture were performed, using 120  $\mu$ l (1.2 mg) of magnetics beads per round. The resulting  
630 supernatant, containing rRNA-depleted RNA, was purified using RNeasy MinElute CleanUp  
631 Kit (QIAGEN; cat. no. 74204). Depletion of rRNAs was evaluated on a 1.2% TBE-agarose gel.  
632 cDNA synthesis, library preparation and sequencing: Synthesis of cDNA was performed using  
633 NEBNext Ultra Directional RNA Library Prep Kit from Illumina (New England Biolabs; cat. no.  
634 E7420) according to the manufacturer's instruction. The concentration of cDNA was measured  
635 using Qubit dsDNA HS Assay Kit (Invitrogen, cat. no. Q32854) and a Qubit 2.0 Fluorometer  
636 (Invitrogen; cat. no. Q32866). To generate strand-specific RNA-seq libraries, uracil excision  
637 and removing of the second strand was performed prior to conversion of Y-shaped adapters.  
638 Therefore, 3  $\mu$ l of USER enzyme (New England Biolabs; cat. no. M5505) were mixed with 16  $\mu$ l  
639 of adapter-ligated DNA, 1  $\mu$ l of TruSeq PCR primer cocktail (50  $\mu$ M) and 20  $\mu$ l of KAPA HiFi  
640 HotStart ReadyMix (KAPA Biosystems, cat. no. KK2601). USER digestion was performed at  
641 37  $^{\circ}$ C for 15 min, followed by the published amplification protocol. Library concentrations were  
642 determined in duplicate using Qubit dsDNA HS Assay Kit (Invitrogen, cat. no. Q32854) and  
643 a Qubit 2.0 Fluorometer (Invitrogen, cat. no. Q32866) and quantified using the KAPA Library  
644 Quantification Kit (KAPA Biosystems, cat. no. KK4824) according to the manufacturer's  
645 instruction. Strand-specific RNA-sequencing libraries were sequenced in paired-end mode on  
646 an Illumina NextSeq 500 sequencer (2  $\times$  75 cycles). Processing of sequencing data: The

647 sequencing datasets were mapped to the TbruceiLister427\_2018 genome assembly (release  
648 43, downloaded from TriTrypDB <sup>44</sup>) using BWA-mem <sup>45</sup>. The alignments were converted from  
649 SAM to BAM format, sorted, indexed and filtered by alignment quality ( $q>0$ ) using SAMtools  
650 version 1.9 <sup>35</sup>. To visualize read coverage, the number of reads was normalized per billion  
651 mapped reads and coverage files were generated in the wiggle format using COVERnant  
652 version 0.3.0 with the subcommand *ratio* <sup>46</sup>.

653 ***In situ Hi-C.*** In situ Hi-C was performed as previously described <sup>5</sup>.  $2 \times 10^8$  cells were collected  
654 per replicate and resuspended in 40 ml of 1× trypanosome dilution buffer (1× TDB; 0.005 M  
655 KCl, 0.08 M NaCl, 0.001 M  $MgSO_4 \times 7H_2O$ , 0.02 M  $Na_2HPO_4$ , 0.002 M  $NaH_2PO_4 \times 2H_2O$ , 0.02  
656 M glucose) or 1× PBS (insect stage cells). Cells were fixed in the presence of 1%  
657 formaldehyde for 20 min at room temperature by addition of 4 ml of 11% formaldehyde solution  
658 (50 mM Hepes-KOH pH 7.5, 100 mM NaCl, 1 mM EDTA pH 8.0, 0.5 mM EGTA pH 8.0, 11%  
659 formaldehyde). The reaction was stopped by addition of 3 ml of 2 M glycine and incubation for  
660 5 min at room temperature and 15 min on ice. Cells were washed twice in 1× TDB for  
661 bloodstream form cells or 1× PBS for insect stage cells, respectively, and the cell pellet was  
662 snap-frozen in liquid nitrogen. Cells were resuspended in 1 ml of permeabilization buffer (100  
663 mM KCl, 10 mM Tris pH 8.0, 25 mM EDTA) supplemented with protease inhibitors (1.5 mM  
664 pepstatin A, 4.25 mM leupeptin, 1.06 mM PMSF, 1.06 mM TLCK) and digitonin (200  $\mu$ M final  
665 concentration) and incubated for 5 min at room temperature. Cells were washed twice in 1×  
666 NEBuffer3.1 (NEB, B7003S) and resuspended in 342  $\mu$ l of 1× NEBuffer3.1. After addition of  
667 38  $\mu$ l of 1% SDS, and an incubation at 65 °C for 10 min, SDS was quenched by addition of 43  
668  $\mu$ l of 10% Triton-X 100 (Sigma). Incubation was continued at room temperature for 15 min.  
669 Another 35  $\mu$ l of water, 13  $\mu$ l of 10× NEBuffer3.1 and 100 units of Mbol (NEB, R0147M) were  
670 added and the chromatin was digested at 37 °C overnight while shaking. To inactivate Mbol,  
671 the sample was incubated at 65 °C for 20 min. Restriction fragments were biotinylated by  
672 supplementing the reaction with 60  $\mu$ l of fill-in mix (0.25 mM biotin-14-dATP (Life

673 Technologies, 19524016), 0.25 mM dCTP, 0.25 mM dGTP, 0.25 mM dTTP (Fermentas), 40  
674 U of DNA polymerase I, large (Klenow) fragment (NEB, M0210)) and incubation at 23 °C for  
675 4 h. The end-repaired chromatin was transferred to 665 µl of ligation mix (1.8% Triton-X 100,  
676 0.18 mg BSA, 1.8× T4 DNA Ligase Buffer (Invitrogen, 46300018) and 5 µl of T4 DNA ligase  
677 (Invitrogen, 15224025) were added. The ligation was performed for 4 h at 16 °C with interval  
678 shake. Crosslinks were reversed by adding 50 µl of 10 mg/ml proteinase K (65 °C for 4 h)  
679 following addition of another 50 µl of 10mg/ml proteinase K, 80 µl of 5 M NaCl and 70 µl of  
680 10% SDS (65 °C, overnight). DNA was precipitated with ethanol and resuspended in 257 µl  
681 of TLE (10 mM Tris-HCl, 0.1 mM EDTA, pH 8.0). SDS was added to a final concentration of  
682 0.1% and the sample was split among two tubes for sonication (Covaris S220; microtubes,  
683 175 W peak incident power, 10% duty factor, 200 cycles per burst, 240 s treatment). The  
684 samples were recombined and the volume was adjusted to 300 µl with TLE. Fragments  
685 between 100 and 400 bp in size were selected using Agencourt AMPure XP beads (Beckman  
686 Coulter), according to the manufacturer's instructions. The DNA fragments were eluted off the  
687 beads in 55 µl of TLE. For end-repair and biotin removal from un-ligated ends, 70 µl of end-  
688 repair mix was added (1× Ligation buffer (NEB), 357 µM dNTPs, 25U T4 PNK (NEB, M0201),  
689 7.5U T4 DNA polymerase I (NEB, M0203), 2.5U DNA polymerase I, large (Klenow) fragment  
690 (NEB, M0210)) and incubated for 30 min at 20 °C and 20 min at 75 °C. To inactivate the  
691 enzymes, EDTA was added to a final concentration of 10 mM. To isolate biotin-labelled ligation  
692 junctions, 50 µl of 10 mg/ml Dynabeads MyOne Streptavidin C1 (Life Technologies, 65001)  
693 were washed with 400 µl of 1× Tween washing buffer (TWB; 5 mM Tris-HCl pH 7.5, 0.5 mM  
694 EDTA, 1 M NaCl, 0.05% Tween-20), collected with a magnet, resuspended in 400 µl of 2×  
695 binding buffer (10 mM Tris-HCl pH 7.5, 1 mM EDTA, 2 M NaCl) and added to the sample  
696 suspended in 330 µl TLE. Biotinylated DNA was bound to the beads by incubating the sample  
697 for 15 min at room temperature with slow rotation. Subsequently, the DNA-bound beads were  
698 captured with a magnet, washed twice with 400 µl of 1× binding buffer, washed once in 100

699  $\mu$ l of 1 $\times$  TLE T4 ligase buffer and resuspended in 41  $\mu$ l of TLE. For polyadenylation, 5  $\mu$ l of 10 $\times$   
700 NEBuffer2.1, 1  $\mu$ l of 10 mM dATP and 3  $\mu$ l of 5 U/ $\mu$ l of Klenow fragment (3'→ 5' exo (-)) (NEB,  
701 M0212) were added and the sample was incubated for 30 min at 37 °C followed by a  
702 deactivation step at 65 °C for 20 min. Beads were collected with a magnet, washed once with  
703 400  $\mu$ l 1 $\times$  Quick ligation buffer (NEB, M2200) and resuspended in 46.5  $\mu$ l of 1 $\times$  Quick ligation  
704 buffer (NEB, M2200). 2.5  $\mu$ l of DNA Quick ligase (NEB, M2200) and 0.5  $\mu$ l of 50  $\mu$ M annealed  
705 TruSeq adapters were added and incubated for 1 h at room temperature. Beads were  
706 separated on a magnet, resuspended in 400  $\mu$ l of 1 $\times$  TWB and washed for 5 min at room  
707 temperature with rotation. Beads were washed on the magnet with 200  $\mu$ l 1 $\times$  binding buffer  
708 and 200  $\mu$ l of 1 $\times$  NEBuffer2.1 and resuspended in 20  $\mu$ l of 1 $\times$  NEBuffer2.1. The library was  
709 amplified in eight separate reactions of 50  $\mu$ l. Per reaction, 1.5  $\mu$ l of 25  $\mu$ M TruSeq PCR primer  
710 cocktail (TruSeq PCR primer cocktail\_F, 5'-AATGATACGGCGACCACCGAG-3'; TruSeq  
711 PCR primer cocktail\_R; 5'-CAAGCAGAAGACGGCATACGAG-3'), 25  $\mu$ l of 2 $\times$  Kapa HiFi  
712 HotStart Ready Mix (Kapa Biosystems, KR0370) and 21.5  $\mu$ l of water were added to 2  $\mu$ l of  
713 library bound to the beads. Amplification was performed as follows: 3 min at 95 °C, 5 cycles  
714 of 20 s at 98 °C, 30 s at 63 °C and 30 s at 72 °C, 1 cycle of 1 min at 72 °C, hold at 4 °C. The  
715 PCR reactions were pooled and the beads were removed from the supernatant using a  
716 magnet. The library was purified by addition of 1.5 volumes of Agencourt AMPure XP beads  
717 (Beckman Coulter), according to the manufacturer's instructions. The sample was eluted off  
718 the beads using 25  $\mu$ l of 1 $\times$  TLE buffer, transferred to a fresh tube and the concentration was  
719 determined using Qubit (Qubit dsDNA HS Assay Kit, Thermo Fisher) and qPCR (KAPA SYBR  
720 FAST qPCR Master Mix, Kapa Biosystems), according to the manufacturer's instructions.  
721 Library size distributions were determined on a 5% polyacrylamide gel. Paired-end 75-bp  
722 sequencing was carried out using the Illumina NextSeq 500 system with mid or high output  
723 NextSeq 500/550 kits v.2.5 according to the manufacturer's instructions.

724

725 **Mapping of Hi-C reads and generation of interaction matrices.** Reads were mapped to a  
726 modified version of the TbruceiLister427\_2018 genome assembly (downloaded from  
727 TriTrypDB, release 43) containing the following modifications. For all Hi-C experiments, we  
728 masked a newly discovered misassembly in bloodstream expression site 2 (BES2) with Ns.  
729 For Hi-C experiments in 2T1-control<sup>27</sup> and VEX2 knockdown cells, we added the transfected  
730 constructs as separate contigs to the genome. The construct sequences, as well as the  
731 modified genome have been deposited together with the results of the analyses under  
732 <https://doi.org/10.5281/zenodo.3568483>. Mapping, filtering, normalization and read counting  
733 were performed by the mHi-C pipeline as described in<sup>17</sup>. We modified the pipeline to be  
734 compatible with the *T. brucei* genome assembly and also incorporated a merging step for the  
735 individual replicates after the removal of duplicate reads, but before data normalization (step  
736 4) in order to avoid the introduction of any bias by the merge. We chose ICEing as the  
737 normalization method and finally filtered the mHi-C outcome by the posterior probability of 0.6  
738 (i.e. reads are assigned to a bin with a likelihood of at least 60%). Downstream analyses such  
739 as normalizing for the different ploidy within the *T. brucei* genome assembly, have been  
740 implemented with in-house scripts. The digestion of the reference genome with the restriction  
741 site has been implemented using HiC-Pro Utilities<sup>47</sup>. All scripts necessary to reproduce the  
742 Hi-C analyses can be found at: <https://github.com/bgbrink/PRJEB35632>.

743

744 **Virtual 4C analysis.** To visualize interactions between one genomic region (viewpoint) and  
745 all other genomic sites, relevant bins were extracted from a 20-kb or 50-kb Hi-C matrix. An  
746 average interaction value for every genomic bin was calculated if the viewpoint regions  
747 spanned more than one bin. The coordinates that define the different viewpoints used in this  
748 study are shown in Data S1 sheet 2. To determine the relative interaction frequency of a  
749 viewpoint with chromosome cores and sub-telomeres, the average interaction frequency of  
750 the viewpoint with each chromosome core and sub-telomere was calculated based on the

751 relative interaction frequencies extracted by virtual 4C analysis. The ratio between the average  
752 interaction frequency (core) and the average interaction frequency (sub-telomeres) was  
753 calculated for each chromosome and plotted as one dot. The virtual 4C analysis has been  
754 implemented using HiC sunt dracones (<https://doi.org/10.5281/zenodo.3570496>). All scripts  
755 necessary to reproduce the Hi-C analyses can be found at:  
756 <https://github.com/bgbrink/PRJEB35632>.

757

758 **Statistical analysis.** All statistical analysis was performed using GraphPad Prism Software  
759 (version 7.0). A detailed summary of *n* and *p* values for all the analyses performed in this study  
760 is provided in Data S1 sheet 3.

761

762 **Resources and Reagents.** All unique materials are available on request.

763

764 **Data S1. (separate file)**

765 Sheet 1. ChIP-Seq data for VEX1<sup>myc</sup> expressing bloodstream form *T. brucei*

766 Sheet 2. Coordinates of the viewpoints used in the virtual 4C analyses

767 Sheet 3. Summary of all statistical analyses

768 **References for Methods Section:**

769 27 Alsford, S., Kawahara, T., Glover, L. & Horn, D. Tagging a *T. brucei* *RRNA* locus  
770 improves stable transfection efficiency and circumvents inducible expression position  
771 effects. *Mol Biochem Parasitol* **144**, 142-148 (2005).

772 28 Glover, L. *et al.* Genome-scale RNAi screens for high-throughput phenotyping in  
773 bloodstream-form African trypanosomes. *Nat Protoc* **10**, 106-133 (2015).

774 29 Alsford, S. & Horn, D. Elongator protein 3b negatively regulates ribosomal DNA  
775 transcription in african trypanosomes. *Mol Cell Biol* **31**, 1822-1832 (2011).

776 30 Berriman, M. *et al.* The genome of the African trypanosome *Trypanosoma brucei*.  
777 *Science* **309**, 416-422 (2005).

778 31 Becker, M. *et al.* Isolation of the repertoire of VSG expression site containing  
779 telomeres of *Trypanosoma brucei* 427 using transformation-associated  
780 recombination in yeast. *Genome Res* **14**, 2319-2329 (2004).

- 781 32 Hertz-Fowler, C. *et al.* Telomeric expression sites are highly conserved in  
782 *Trypanosoma brucei*. *PLoS One* **3**, e3527 (2008).
- 783 33 Kolev, N. G., Ramey-Butler, K., Cross, G. A., Ullu, E. & Tschudi, C. Developmental  
784 progression to infectivity in *Trypanosoma brucei* triggered by an RNA-binding protein.  
785 *Science* **338**, 1352-1353 (2012).
- 786 34 Langmead, B. & Salzberg, S. L. Fast gapped-read alignment with Bowtie 2. *Nat*  
787 *Methods* **9**, 357-359 (2012).
- 788 35 Li, H. *et al.* The Sequence Alignment/Map format and SAMtools. *Bioinformatics* **25**,  
789 2078-2079 (2009).
- 790 36 Rutherford, K. *et al.* Artemis: sequence visualization and annotation. *Bioinformatics*  
791 **16**, 944-945 (2000).
- 792 37 Gu, Z., Gu, L., Eils, R., Schlesner, M. & Brors, B. circlize Implements and enhances  
793 circular visualization in R. *Bioinformatics* **30**, 2811-2812 (2014).
- 794 38 Ramirez, F. *et al.* deepTools2: a next generation web server for deep-sequencing  
795 data analysis. *Nucleic Acids Res* **44**, W160-165 (2016).
- 796 39 Siegel, T. N., Hekstra, D. R. & Cross, G. A. Analysis of the *Trypanosoma brucei* cell  
797 cycle by quantitative DAPI imaging. *Mol Biochem Parasitol* **160**, 171-174 (2008).
- 798 40 Woodward, R. & Gull, K. Timing of nuclear and kinetoplast DNA replication and early  
799 morphological events in the cell cycle of *Trypanosoma brucei*. *J Cell Sci* **95 ( Pt 1)**,  
800 49-57 (1990).
- 801 41 Park, J. H., Jensen, B. C., Kifer, C. T. & Parsons, M. A novel nucleolar G-protein  
802 conserved in eukaryotes. *J Cell Sci* **114**, 173-185 (2001).
- 803 42 Schindelin, J. *et al.* Fiji: an open-source platform for biological-image analysis. *Nat*  
804 *Methods* **9**, 676-682 (2012).
- 805 43 Kraus, A. J., Brink, B. G. & Siegel, T. N. Efficient and specific oligo-based depletion  
806 of rRNA. *Sci Rep-Uk* **9**, 12281 (2019).
- 807 44 Aslett, M. *et al.* TriTrypDB: a functional genomic resource for the Trypanosomatidae.  
808 *Nucleic Acids Res* **38**, D457-D462 (2010).
- 809 45 Li, H. & Durbin, R. Fast and accurate short read alignment with Burrows-Wheeler  
810 transform. *Bioinformatics* **25**, 1754-1760 (2009).
- 811 46 Wedel, C., Forstner, K. U., Derr, R. & Siegel, T. N. GT-rich promoters can drive RNA  
812 pol II transcription and deposition of H2A.Z in African trypanosomes. *Embo J* **36**,  
813 2581-2594 (2017).
- 814 47 Servant, N. *et al.* HiC-Pro: an optimized and flexible pipeline for Hi-C data  
815 processing. *Genome Biol* **16**, 259 (2015).  
816  
817

818 **Extended Data:**

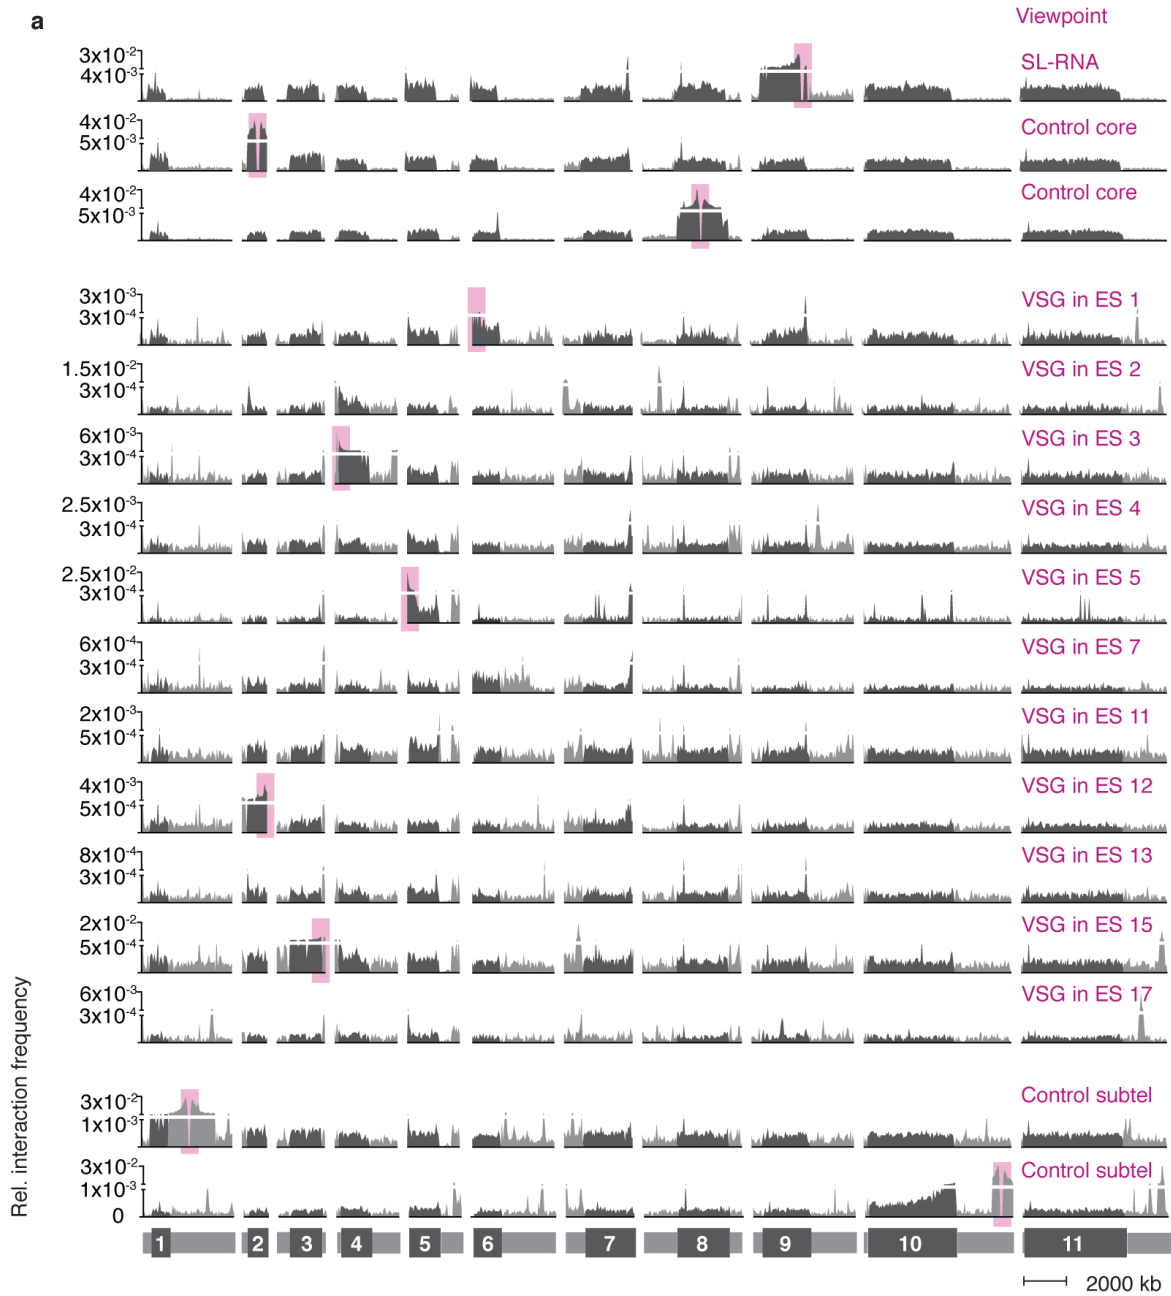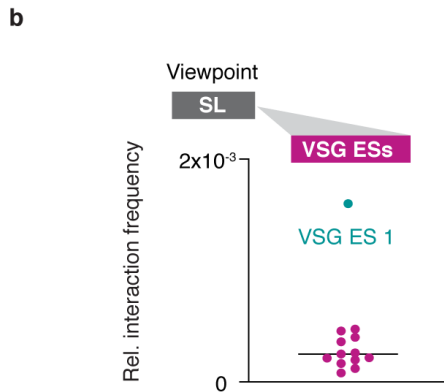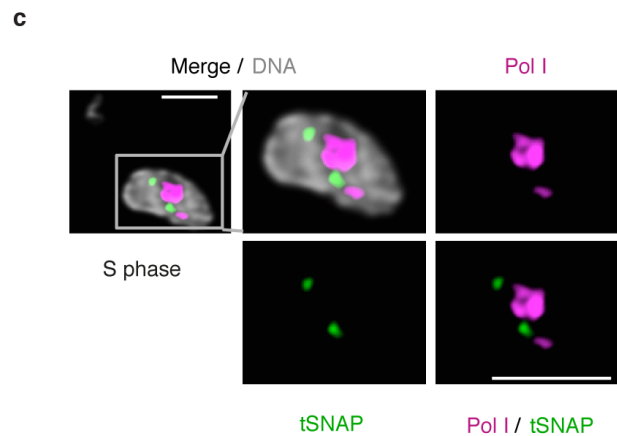



819 **Extended Data Fig. 1 Genome-wide interaction frequencies of VSG genes in expression sites and the SL-**  
820 **RNA locus. a**, Hi-C (virtual 4C) analysis with locations of viewpoints marked by pink boxes. Viewpoints VSG ES  
821 4, 7, 11 and 17 are located on intermediate chromosomes that are not depicted in this figure. Interaction  
822 frequencies between each viewpoint and the 11 mega-base chromosomes are shown. Chromosome cores, dark  
823 grey; sub-telomeric regions, light grey. The hemizygous sub-telomeric regions of each chromosome are displayed  
824 in the following order: 5' (haplotype A)–5' (haplotype B)–diploid chromosome core–3' (haplotype A)–3' (haplotype  
825 B). Bin size 50 kb. Virtual 4C analyses in **a-b** are based on Hi-C experiments of *VSG-2* expressing cells (n=2, the  
826 average is shown). **b**, Virtual 4C analysis, viewpoint: SL-RNA locus (chr. 9). Relative interaction frequencies  
827 between the viewpoint and the active VSG ES 1 (cyan) and inactive VSG ESs (magenta) is shown. Each dot  
828 represents the average value for one expression site. Bin size 20 kb. **c**, Immunofluorescence-based colocalisation  
829 studies of tSNAP<sup>myc</sup> (SL-RNA transcription compartment) and a nucleolar and active-*VSG* transcription  
830 compartment marker (Pol I, largest subunit) using super resolution microscopy. DNA was counter-stained with  
831 DAPI; the images correspond to maximal 3D projections of stacks of 0.1  $\mu\text{m}$  slices and are representative of two  
832 biological replicates and three independent experiments; scale bars 2  $\mu\text{m}$ .

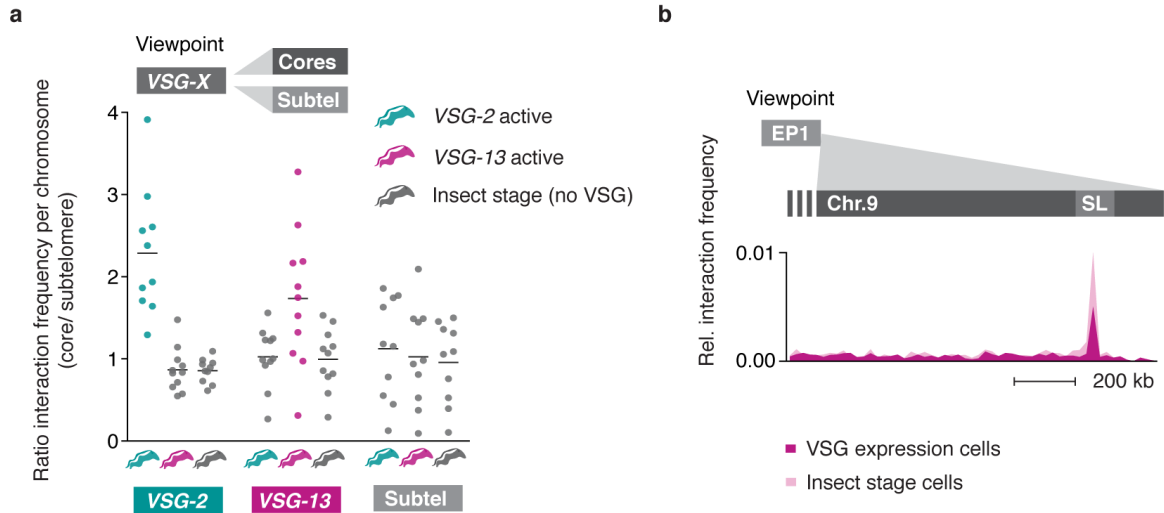

833

834

835 **Extended Data Fig. 2 Changes in DNA-DNA interactions following a change in VSG isoform expression. a,**

836 Hi-C (virtual 4C) analysis, viewpoints VSG-2, VSG-13 and a sub-telomeric control region. Each dot represents the

837 ratio of: the average interaction frequency of the viewpoint with the chromosome core / the average interaction

838 frequency with the sub-telomeres. One dot per chromosome is plotted. The black bar marks the median ratio per

839 viewpoint. Bin size 50 kb. **b,** Virtual 4C analysis, viewpoint: EP1 gene array (chr. 10). Relative interaction

840 frequencies between the EP1 array and the SL-RNA locus are plotted. Bin size 20 kb.

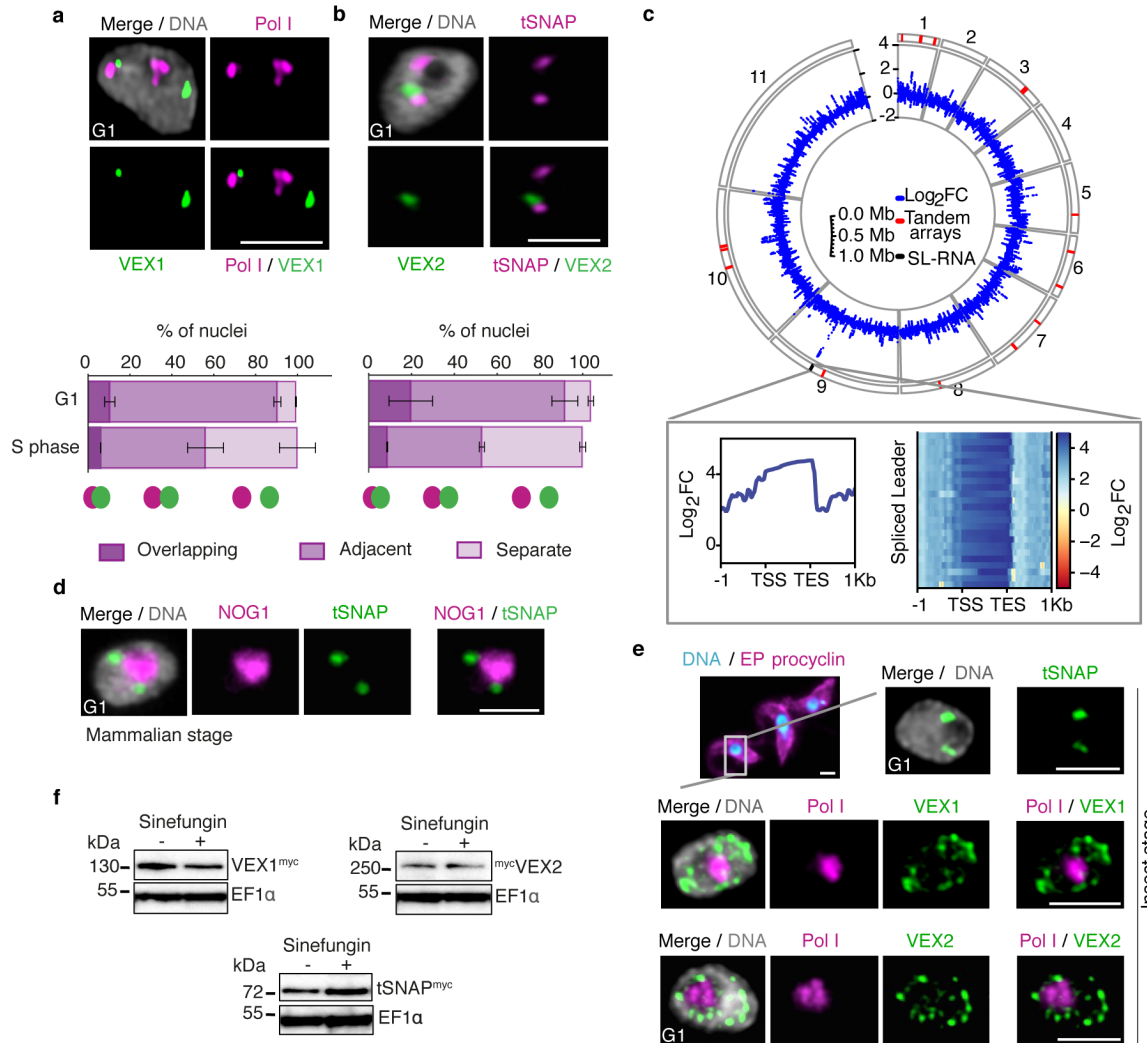

841  
842 **Extended Data Fig. 3. The VEX complex associates with both the active-VSG and the *Spliced Leader* (SL)-**  
843 **locus in a cell cycle and developmental stage-dependent manner. a-b,** Immunofluorescence-based  
844 colocalisation studies of VEX1<sup>myc</sup> / Pol I and GFPVEX2 / tSNAP<sup>myc</sup> in bloodstream form cells. tSNAP and Pol I were  
845 used as markers for the SL-RNA and VSG transcription compartments, respectively. The stacked bar graphs depict  
846 proportions of nuclei with overlapping, adjacent or separate signals and values are averages of two independent  
847 experiments ( $\geq 100$  nuclei for G1 and S phase cells); detailed *n* and *p* values are provided in Data S1 sheet 3. **c,**  
848 VEX1<sup>myc</sup> chromatin immunoprecipitation followed by next generation sequencing (ChIP-seq) analysis. The circle  
849 plot represents log<sub>2</sub> fold change of ChIP versus Input of non-overlapping 1 kbp bins of the 11 megabase  
850 chromosomes; outside track shows tandem arrays (red) and the SL-RNA locus (black). An inset zooming on the  
851 SL-RNA locus is depicted: metagene plot (left-hand side) and heat-map (right-hand side) of SL-gene loci. Bin size  
852 300 bp. **d,** Immunofluorescence-based colocalisation studies of tSNAP<sup>myc</sup> and a nucleolar marker (NOG1) in  
853 bloodstream forms. **e,** Localisation of tSNAP<sup>GFP</sup> and colocalisation studies of VEX1<sup>myc</sup> or mycVEX2 and Pol I in  
854 procyclic forms (insect-stage), using immunofluorescence. Procyclic forms do not express VSGs whereas  
855 procyclins are the major surface glycoprotein. Images in **a-b** / **d-e** were obtained with super resolution microscopy  
856 and correspond to maximal 3D projections of stacks of 0.1  $\mu\text{m}$  slices; DNA was counter-stained with DAPI; scale  
857 bars 2  $\mu\text{m}$ . **f,** Western-blot analysis of VEX1<sup>myc</sup>, mycVEX2 and tSNAP<sup>myc</sup> before and after sinefungin treatment (5  
858  $\mu\text{g ml}^{-1}$  for 30 min at 37°C), which blocks *trans*-splicing in trypanosomes. Data in **a-b** and **d-f** are representative of  
859 at least two independent biological replicates and two independent experiments.

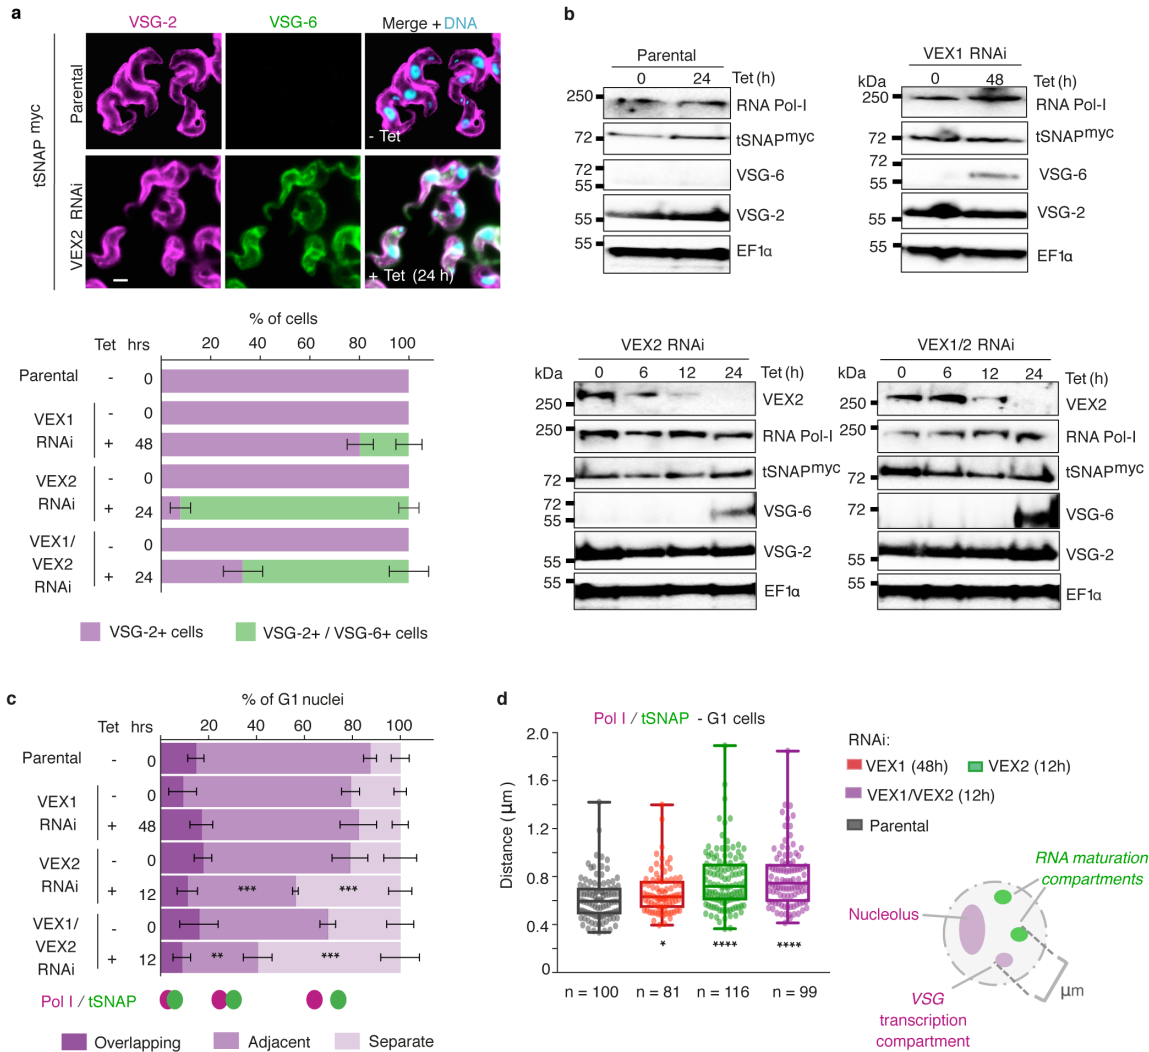

860  
861  
862  
863  
864  
865  
866  
867  
868  
869  
870  
871  
872  
873  
874  
875  
876  
877  
878  
879  
880

**Extended Data Fig. 4. Pol I and tSNAP expression and localisation following knockdown of the VEX complex.** **a**, Immunofluorescence-based analysis of VSG expression following tetracycline (Tet) inducible VEX1 knockdown, VEX2 knockdown or VEX1/VEX2 knockdown. VSG-2 (magenta) is the active-VSG and VSG-6 (green) is a silent-VSG in this strain. The stacked bar graph depicts percentages of VSG-2 single positive cells and VSG-2/VSG-6 double positive cells; values are averages of two independent experiments and two biological replicates. DNA was counter-stained with DAPI; scale bar 2 μm. **b**, Western-blot analysis of VEX2, Pol I, tSNAP<sup>myc</sup>, VSG-6 and VSG-2 expression following VEX1, VEX2 or VEX1/VEX2 knockdown. EF1α was used as a loading control. The data is representative of two independent experiments and two biological replicates. **c-d**, Immunofluorescence-based colocalisation studies of tSNAP<sup>myc</sup> and a nucleolar and active-VSG marker (Pol I, large subunit). The stacked bar graph in **c** depicts proportions of G1 nuclei with tSNAP<sup>myc</sup> / Pol I overlapping, adjacent or separate signals following tetracycline (Tet) inducible VEX1 (48 h), VEX2 (12 h) or VEX1/VEX2 knockdown (12 h). tSNAP<sup>myc</sup> / active-VSG localisation were not monitored beyond 12 h following VEX2 and VEX1/2 knockdown as Pol I signal drops below detection at later time-points. The values are averages of two independent experiments and two biological replicates (≥100 G1 nuclei). In the box plot in **d**, the distance between the edges of the ESB and tSNAP foci was measured in > 81 G1 nuclei. The centre lines show the medians; box limits indicate the 25th and 75th percentiles; whiskers extend from maximal to the minimal values; all data points are shown. In **a/c**, error bars, SD. In **c-d**, knockdown conditions were compared to parental cells using two-tailed paired (**c**) or unpaired (**d**) Student's *t*-tests: \*, *p* < 0.05; \*\*, *p* < 0.01; \*\*\*, *p* < 0.001; \*\*\*\*, *p* < 0.0001. Detailed *n* and *p* values are provided in Data S1 sheet 3.

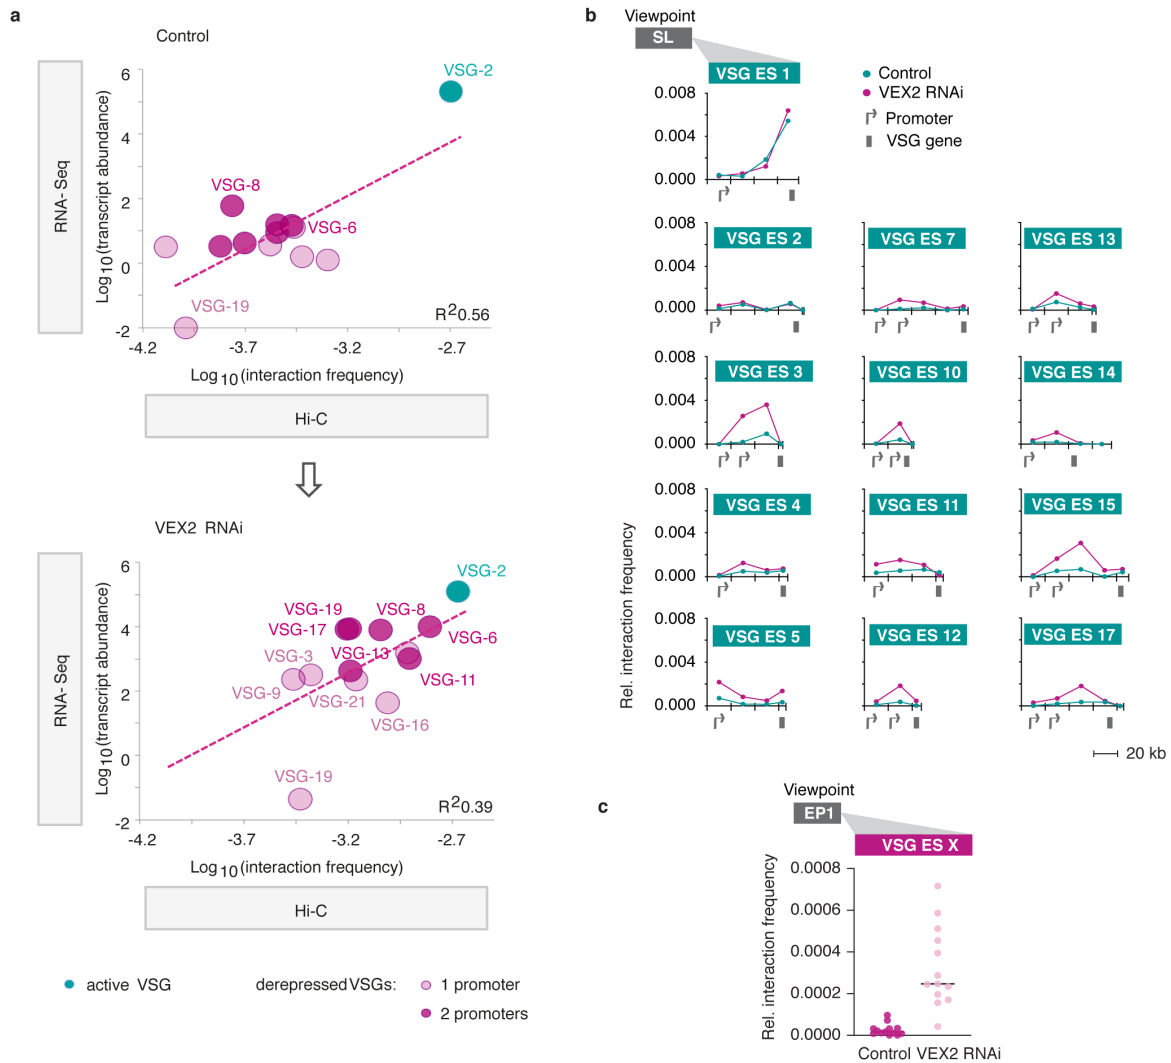

881  
882  
883  
884  
885  
886  
887  
888

**Extended Data Fig. 5. Genome-wide changes in VEX2 depleted cells.** **a**, Correlation between the average interaction frequency of VSG expression-sites as viewpoint with the SL-RNA locus and VSG expression in reads per kilobase per million (RNA-seq data from <sup>16</sup>) in control and VEX2-depleted cells. **b**, Hi-C (virtual 4C) analysis, viewpoint: SL-RNA locus (chr. 9). Relative interaction frequencies between the viewpoint and VSG expression sites are shown. Bin size 20 kb. **c**, Virtual 4C analysis, viewpoint: EP1 gene array (chr.10). Relative interaction frequencies between the viewpoint and the VSG expression sites are shown. Each dot represents the average value for one expression site. Bin size 20 kb.

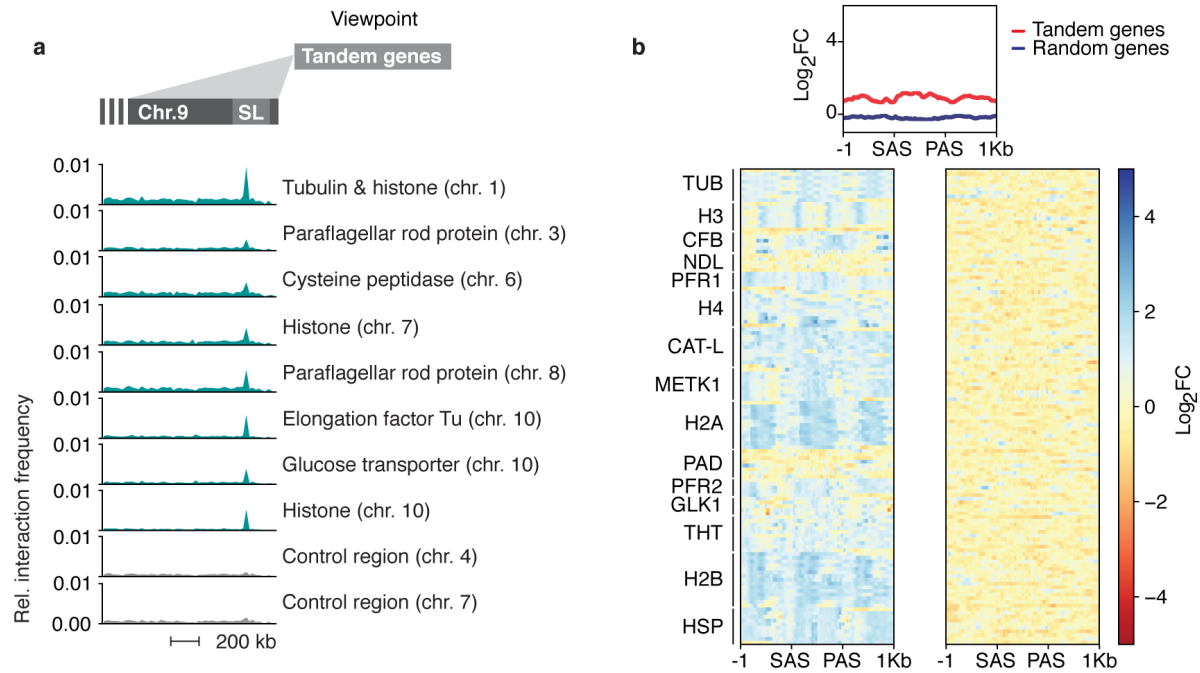

889

890

891 **Extended Data Fig. 6. Tandem arrays interact at lower frequency with the *Spliced Leader (SL)*-locus. a,** Hi-

892 C (virtual 4C) analysis, viewpoint: different tandem gene arrays and control sites. Relative interaction frequencies

893 between the different viewpoints and the SL-RNA locus are plotted. Bin size 20 kb. **b,** VEX1<sup>myc</sup> chromatin

894 immunoprecipitation followed by next generation sequencing (ChIP-seq) analysis. Top panel, metagenes plot for

895 tandem genes compared to randomly selected genes with no paralogues. Lower left, heat map of tandem genes.

Lower right, randomly selected genes with no paralogues.
